# Supplementary material for: Decision support during electronic prescription to stem antibiotic overuse for acute respiratory infections: a long-term, quasi-experimental study
Source: PubMed Central journal article supplement (PMC5537944; doi:10.1186/s12879-017-2602-7), 2017-07-31
Supplement: 12879_2017_2602_MOESM2_ESM.pdf [file 12879_2017_2602_MOESM2_ESM.pdf]

**Table 3. Legend for supplementary data file.**

| <b>Table Heading</b>      | <b>Description</b>                                                                                                                                                                             |
|---------------------------|------------------------------------------------------------------------------------------------------------------------------------------------------------------------------------------------|
| PatID                     | Unique code for individuals with visits included in the study                                                                                                                                  |
| EpisodeNumber             | 1 = First visit for an individual<br>2 = Second visit for an individual                                                                                                                        |
| LUTName                   | Antibiotic prescription associated with visit, according to pharmacy records<br>1= Azithromycin<br>2= Gatifloxacin<br>3= Moxifloxacin<br>4= Penicillin V<br>5= Other<br>Blank= None prescribed |
| PrescriptionMade          | 1= "LUTName" is 1, 2, 3, 4, or 5<br>2= "LUTName" is 0                                                                                                                                          |
| PurulentNasalDrainage     | Purulent nasal drainage (thick or discolored drainage)                                                                                                                                         |
| PainTenderness            | Maxillofacial sinus and/or tooth pain/tenderness (including reported frontal headache)                                                                                                         |
| SinusSxs7days             | Sinusitis-related symptom duration of greater than or equal to 7 days                                                                                                                          |
| Unilateral                | Unilateral sinus-related symptoms (pain, tenderness or swelling)                                                                                                                               |
| Worseningafterimprovement | Worsening of sinus-related symptoms after initial improvement                                                                                                                                  |
| Feverchillsnightsweats    | New fever (subjective or objective[ $\geq 37.8C/100F$ ]), chills or night sweats within the last 7 days                                                                                        |
| Sorethroat                | Sore throat                                                                                                                                                                                    |
| Cough21                   | New cough of duration < 21 days                                                                                                                                                                |
| Cough7                    | New or changed cough within last 7 days                                                                                                                                                        |
| Sputum                    | New or changed sputum production within last 7 days                                                                                                                                            |
| Dyspnea                   | New or changed dyspnea within last 7 days                                                                                                                                                      |
| Pleuriticchestpain        | New or changed pleuritic chest pain within last 7 days                                                                                                                                         |
| AntibioticPrescribed      | 1= Visit documentation indicates that an antibiotic was prescribed<br>0= Visit documentation does not indicate that an antibiotic was prescribed                                               |
| AbxforOtherDx             | 1= Antibiotic explicitly prescribed for a non-ARI diagnosis<br>0= Antibiotic not explicitly prescribed for a non-ARI diagnosis                                                                 |
| AcutePneumonia            | 1= Visit meets criteria for pneumonia<br>2= Visit does not meet criteria for pneumonia                                                                                                         |
| AcuteSinusitis            | 1= Visit meets criteria for acute sinusitis<br>2= Visit does not meet criteria for acute sinusitis                                                                                             |
| AcuteBronchitis           | 1= Visit meets criteria for acute bronchitis<br>2= Visit does not meet criteria for acute bronchitis                                                                                           |
| ARIofInterest             | 1= Symptoms lead to a diagnosis of interest (pneumonia, sinusitis, bronchitis)<br>0= Symptoms do not lead to a diagnosis of interest                                                           |
| Appropriateness           | 1= Antibiotic prescription or non-prescription was appropriate based on the ARI treatment guidelines<br>0= Antibiotic prescription or non-prescription was not appropriate                     |

|         |                                                                                                                                                                                                                        |
|---------|------------------------------------------------------------------------------------------------------------------------------------------------------------------------------------------------------------------------|
|         | based on the ARI treatment guidelines                                                                                                                                                                                  |
| PrePost | 1= Visit occurred before the date of change from gatifloxacin to moxifloxacin<br>0= Visit occurred after the date of change from gatifloxacin to moxifloxacin                                                          |
| Race    | Patient race, self-reported. Options are:<br>White<br>Black or African American<br>Asian<br>Native Hawaiian or other Pacific Islander<br>American Indian or Alaskan Native<br>Unknown by patient<br>Declined to answer |
