# Supplementary material for: Decision support during electronic prescription to stem antibiotic overuse for acute respiratory infections: a long-term, quasi-experimental study
Source: BMC Infect Dis. 2017 Jul 31;17:528. doi: 10.1186/s12879-017-2602-7 (PMC5537944; doi:10.1186/s12879-017-2602-7)
Supplement: Supplementary file 1 — Coded dataset for the study. (XLS 263 kb) [file 12879_2017_2602_MOESM1_ESM.xls]

## Sheet: coded
PatID	EpisodeNumber	LUTName	PrescriptionMade	PneumoniaDx	PurulentNasalDrainage	PainTenderness	SinusSxs7days	Unilateral	Worseningafterimprovement	Feverchillsnightsweats	Sorethroat	Cough21	Cough7	Sputum	Dyspnea	Pleuriticchestpain	AntibioticPrescribed	AbxforOtherDx	AcutePneumonia	AcuteSinusitis	AcuteBronchitis	ARIofInterest	Appropriateness	PrePost	Race
PT0371	1	1	1	0	1	1	0	0	0	1	1	1	1	1	0	0	1	0	0	1	1	1	0	0	WHITE
PT0376	1	1	1	0	0	0	0	0	0	0	1	1	1	1	0	0	1	0	0	0	1	1	0	0	BLACK OR AFRICAN AMERICAN
PT0377	1	1	1	1	0	0	0	0	0	0	0	1	1	1	0	0	1	0	1	0	0	1	1	1	BLACK OR AFRICAN AMERICAN
PT0382	1	1	1	0	1	0	1	0	0	0	0	1	0	0	0	0	1	0	0	1	1	1	0	1	WHITE
PT0384	1	1	1	1	0	0	0	0	0	1	0	1	1	1	0	0	1	0	1	0	0	1	1	1	BLACK OR AFRICAN AMERICAN
PT0393	1	1	1	1	0	0	0	0	0	1	1	1	1	1	1	1	1	0	1	0	0	1	1	0	WHITE
PT0402	1	1	1	1	0	0	0	0	0	1	1	1	1	1	0	0	1	0	1	0	0	1	1	0	WHITE
PT0404	1	1	1	1	0	0	0	0	0	1	0	1	1	1	0	0	1	0	1	0	0	1	1	1	BLACK OR AFRICAN AMERICAN
PT0405	1	1	1	0	1	1	0	0	0	0	1	1	1	1	0	0	1	0	0	1	1	1	0	0	BLACK OR AFRICAN AMERICAN
PT0408	1	1	1	0	0	0	0	0	0	0	0	1	1	1	1	0	1	0	0	0	1	1	0	1	BLACK OR AFRICAN AMERICAN
PT0409	1	1	1	1	0	0	0	0	0	1	1	0	0	0	0	0	1	0	1	0	0	1	1	0	WHITE
PT0413	1	1	1	0	0	0	0	0	0	1	1	1	1	0	0	0	1	0	0	0	1	1	0	1	BLACK OR AFRICAN AMERICAN
PT0419	1	1	1	1	0	0	0	0	0	0	0	1	1	0	0	0	1	0	1	0	0	1	1	1	BLACK OR AFRICAN AMERICAN
PT0422	1	1	1	1	0	0	0	0	0	1	0	1	1	1	1	1	1	0	1	0	0	1	1	1	BLACK OR AFRICAN AMERICAN
PT0427	1	1	1	1	1	0	0	0	0	0	1	1	1	0	0	0	1	0	1	1	0	1	1	0	WHITE
PT0437	1	1	1	0	0	0	0	0	0	0	1	1	1	1	0	0	1	0	0	0	1	1	0	0	WHITE
PT0438	1	1	1	0	1	1	0	0	0	1	1	1	1	1	0	0	1	0	0	1	1	1	0	0	WHITE
PT0441	1	1	1	1	1	0	1	0	0	0	1	0	0	0	0	0	1	0	1	1	0	1	1	0	WHITE
PT0453	1	1	1	0	0	0	0	0	0	1	0	1	1	1	0	0	1	0	0	0	1	1	0	1
PT0457	1	1	1	0	0	0	0	0	0	1	1	1	1	1	0	0	1	0	0	0	1	1	0	0	BLACK OR AFRICAN AMERICAN
PT0460	1	1	1	1	0	0	0	0	0	1	0	1	1	1	0	1	1	0	1	0	0	1	1	1	BLACK OR AFRICAN AMERICAN
PT0463	1	1	1	1	0	0	0	0	0	0	0	1	0	0	0	0	1	0	1	0	0	1	1	1	BLACK OR AFRICAN AMERICAN
PT0471	1	1	1	1	0	0	0	0	0	1	1	1	1	1	0	0	1	0	1	0	0	1	1	0	DECLINED TO ANSWER
PT0474	1	1	1	1	0	0	0	0	0	0	0	1	0	0	0	0	1	0	1	0	0	1	1	0	BLACK OR AFRICAN AMERICAN
PT0479	1	1	1	0	1	0	0	0	0	1	0	1	1	1	0	0	1	0	0	1	1	1	0	0	BLACK OR AFRICAN AMERICAN
PT0481	1	1	1	1	0	0	0	0	0	0	1	1	1	0	0	0	1	0	1	0	0	1	1	1	WHITE
PT0482	1	1	1	0	0	0	0	0	0	0	0	1	1	1	1	0	1	0	0	0	1	1	0	1	BLACK OR AFRICAN AMERICAN
PT0484	1	1	1	1	0	0	0	0	0	1	1	1	1	1	1	0	1	0	1	0	0	1	1	0	WHITE
PT0485	1	1	1	1	0	0	0	0	0	0	0	0	0	0	0	1	1	0	1	0	0	1	1	1	BLACK OR AFRICAN AMERICAN
PT0486	1	1	1	0	0	0	0	0	0	0	1	1	0	0	0	0	1	0	0	0	1	1	0	1	BLACK OR AFRICAN AMERICAN
PT0487	1	1	1	1	0	0	0	0	0	1	1	1	0	0	0	0	1	0	1	0	0	1	1	0	BLACK OR AFRICAN AMERICAN
PT0489	1	1	1	1	0	0	0	0	0	0	0	1	1	1	0	0	1	0	1	0	0	1	1	1	BLACK OR AFRICAN AMERICAN
PT0491	1	1	1	0	0	0	0	0	0	1	1	1	1	0	0	0	1	0	0	0	1	1	0	1	WHITE
PT0495	1	1	1	1	0	0	0	0	0	1	0	1	1	1	1	1	1	0	1	0	0	1	1	1	BLACK OR AFRICAN AMERICAN
PT0497	1	1	1	0	0	0	0	0	0	0	1	1	1	1	1	1	1	0	0	0	1	1	0	0	BLACK OR AFRICAN AMERICAN
PT0503	1	1	1	1	0	1	0	0	0	1	0	1	1	1	1	1	1	0	1	1	0	1	1	0	WHITE
PT0504	1	1	1	1	0	0	0	0	0	1	0	1	1	1	0	0	1	0	1	0	0	1	1	0	WHITE
PT0506	1	1	1	0	0	0	0	0	0	0	0	1	1	1	0	1	1	0	0	0	1	1	0	1	BLACK OR AFRICAN AMERICAN
PT0509	1	1	1	1	0	0	0	0	0	1	0	1	1	1	1	1	1	0	1	0	0	1	1	1	BLACK OR AFRICAN AMERICAN
PT0510	1	1	1	1	0	0	0	0	0	0	1	1	1	0	0	0	1	0	1	0	0	1	1	0	WHITE
PT0511	1	1	1	1	0	0	0	0	0	1	0	1	1	1	0	0	1	0	1	0	0	1	1	1	BLACK OR AFRICAN AMERICAN
PT0514	1	1	1	0	0	0	0	0	0	0	1	1	1	1	0	0	1	0	0	0	1	1	0	1	WHITE
PT0515	1	1	1	0	1	0	0	0	0	1	1	0	0	0	0	0	1	0	0	1	0	1	0	0
PT0516	1	1	1	0	0	0	0	0	0	0	0	1	1	1	0	0	1	0	0	0	1	1	0	0	BLACK OR AFRICAN AMERICAN
PT0517	1	1	1	0	1	1	1	0	0	0	1	1	0	0	0	0	1	0	0	1	1	1	1	0	WHITE
PT0889	1	1	1	1	0	0	0	0	0	0	0	1	1	0	1	0	1	0	1	0	0	1	1	1	BLACK OR AFRICAN AMERICAN
PT0891	1	1	1	1	0	0	0	0	0	1	0	1	0	0	1	0	1	0	1	0	0	1	1	1	BLACK OR AFRICAN AMERICAN
PT0892	1	1	1	0	0	0	0	0	0	0	1	1	1	1	0	1	1	0	0	0	1	1	0	0	BLACK OR AFRICAN AMERICAN
PT0894	1	1	1	1	0	0	0	0	0	0	0	1	0	0	0	0	1	0	1	0	0	1	1	1	BLACK OR AFRICAN AMERICAN
PT0895	1	1	1	1	0	0	0	0	0	0	0	1	1	1	1	0	1	0	1	0	0	1	1	0
PT0900	1	1	1	1	0	0	1	0	0	0	1	1	0	0	0	0	1	0	1	0	0	1	1	1	BLACK OR AFRICAN AMERICAN
PT0901	1	1	1	1	0	0	0	0	0	0	0	1	0	0	0	0	1	0	1	0	0	1	1	1	BLACK OR AFRICAN AMERICAN
PT0903	1	1	1	0	0	0	0	0	0	0	1	1	0	0	0	0	1	0	0	0	1	1	0	0
PT0908	1	1	1	1	0	0	0	0	0	1	0	1	1	0	0	0	1	0	1	0	0	1	1	1	BLACK OR AFRICAN AMERICAN
PT0915	1	1	1	1	0	0	0	0	0	1	1	1	1	1	1	1	1	0	1	0	0	1	1	1	WHITE
PT0916	1	1	1	0	0	0	0	0	0	0	0	1	0	0	0	0	1	0	0	0	1	1	0	1	BLACK OR AFRICAN AMERICAN
PT0921	1	1	1	0	0	1	1	0	0	0	1	1	1	1	1	0	1	0	0	1	1	1	0	0	WHITE
PT0925	1	1	1	1	1	0	1	0	0	0	0	1	0	0	0	0	1	0	1	1	0	1	1	1	WHITE
PT0928	1	1	1	1	0	0	0	0	0	0	0	1	0	0	0	0	1	0	1	0	0	1	1	1
PT0930	1	1	1	1	0	0	0	0	0	1	0	1	0	0	0	0	1	0	1	0	0	1	1	0	BLACK OR AFRICAN AMERICAN
PT0931	1	1	1	1	0	0	0	0	0	0	0	1	1	1	1	0	1	0	1	0	0	1	1	1	WHITE
PT0936	1	1	1	1	0	1	0	0	0	0	1	1	1	1	0	0	1	0	1	1	0	1	1	1	WHITE
PT0937	1	1	1	0	0	0	0	0	0	0	1	1	1	1	0	0	1	0	0	0	1	1	0	0	BLACK OR AFRICAN AMERICAN
PT0954	1	1	1	1	1	0	1	0	1	0	0	1	0	0	0	0	1	0	1	1	0	1	1	0
PT0957	1	1	1	0	1	0	0	0	0	1	1	1	1	0	0	0	1	0	0	1	1	1	0	0
PT0958	1	1	1	1	0	0	0	0	0	0	0	0	0	0	1	1	1	0	1	0	0	1	1	1	BLACK OR AFRICAN AMERICAN
PT0959	1	1	1	0	0	1	0	1	0	1	1	0	0	0	0	0	1	0	0	1	0	1	0	0	WHITE
PT0962	1	1	1	0	0	0	0	0	0	0	0	1	1	1	1	0	1	0	0	0	1	1	0	1	BLACK OR AFRICAN AMERICAN
PT0965	1	1	1	0	0	0	0	0	0	1	1	1	1	1	0	0	1	0	0	0	1	1	0	1	WHITE
PT0969	1	1	1	0	0	0	0	0	0	0	0	1	0	0	0	0	1	0	0	0	1	1	0	0	BLACK OR AFRICAN AMERICAN
PT0971	1	1	1	1	0	0	0	0	0	0	1	1	0	0	0	1	1	0	1	0	0	1	1	0	WHITE
PT0998	1	1	1	0	0	0	0	0	0	0	1	1	0	1	0	0	1	0	0	0	1	1	0	1	WHITE
PT1003	1	1	1	1	0	0	0	0	0	1	0	1	1	1	0	0	1	0	1	0	0	1	1	0	BLACK OR AFRICAN AMERICAN
PT1009	1	1	1	1	0	0	0	0	0	0	0	1	1	1	1	0	1	0	1	0	0	1	1	0	WHITE
PT1013	1	1	1	0	0	1	1	0	1	1	1	1	0	0	0	0	1	0	0	1	1	1	0	0	WHITE
PT1016	1	1	1	0	0	0	0	0	0	1	0	1	1	0	0	0	1	0	0	0	1	1	0	1	WHITE
PT1026	1	1	1	1	0	0	0	0	0	1	0	1	1	1	0	0	1	0	1	0	0	1	1	1	BLACK OR AFRICAN AMERICAN
PT1027	1	1	1	0	0	0	0	0	0	1	1	1	1	1	0	0	1	0	0	0	1	1	0	1	BLACK OR AFRICAN AMERICAN
PT1028	1	1	1	0	0	0	0	0	0	1	1	1	1	1	0	0	1	0	0	0	1	1	0	0
PT1030	1	1	1	0	0	0	0	0	0	0	1	1	1	1	0	0	1	0	0	0	1	1	0	0
PT1035	1	1	1	0	0	0	0	0	0	0	1	1	0	0	0	0	1	0	0	0	1	1	0	0	BLACK OR AFRICAN AMERICAN
PT1408	1	1	1	1	0	0	0	0	0	1	1	1	0	0	0	0	1	0	1	0	0	1	1	1	BLACK OR AFRICAN AMERICAN
PT1415	1	1	1	1	1	1	0	1	0	1	1	1	1	1	0	0	1	0	1	1	0	1	1	1	BLACK OR AFRICAN AMERICAN
PT1418	1	1	1	1	0	0	0	0	0	0	0	1	0	0	0	0	1	0	1	0	0	1	1	1	BLACK OR AFRICAN AMERICAN
PT1424	1	1	1	1	0	0	0	0	0	1	0	1	1	1	0	0	1	0	1	0	0	1	1	1
PT1433	1	1	1	1	0	0	0	0	0	1	0	1	1	1	0	0	1	0	1	0	0	1	1	1	BLACK OR AFRICAN AMERICAN
PT1438	1	1	1	1	0	0	0	0	0	1	0	1	1	0	0	0	1	0	1	0	0	1	1	1	BLACK OR AFRICAN AMERICAN
PT1442	1	1	1	1	1	0	1	0	0	0	0	1	0	1	0	0	1	0	1	1	0	1	1	1
PT1446	1	1	1	1	0	0	0	0	0	1	0	1	1	0	0	0	1	0	1	0	0	1	1	1	WHITE
PT1447	1	1	1	1	0	0	0	0	0	0	0	1	1	0	0	0	1	0	1	0	0	1	1	0	BLACK OR AFRICAN AMERICAN
PT1450	1	1	1	1	0	1	0	0	0	1	0	1	1	0	0	0	1	0	1	1	0	1	1	1	WHITE
PT1457	1	1	1	0	1	0	0	0	0	0	1	1	1	1	0	0	1	0	0	1	1	1	0	0	WHITE
PT1461	1	1	1	1	1	1	1	0	0	0	0	1	1	1	0	0	1	0	1	1	0	1	1	1
PT1462	1	1	1	1	0	0	0	0	0	0	1	1	1	1	1	0	1	0	1	0	0	1	1	0	WHITE
PT1473	1	1	1	1	0	0	0	0	0	1	1	1	1	1	1	1	1	0	1	0	0	1	1	0	WHITE
PT1474	1	1	1	0	0	0	0	0	0	0	1	1	1	1	0	0	1	0	0	0	1	1	0	1	WHITE
PT1476	1	1	1	1	0	0	0	0	0	1	0	1	1	1	0	0	1	0	1	0	0	1	1	1	BLACK OR AFRICAN AMERICAN
PT1477	1	1	1	0	0	1	1	0	0	0	0	1	0	0	0	0	1	0	0	1	1	1	0	1	BLACK OR AFRICAN AMERICAN
PT1478	1	1	1	1	0	0	0	0	0	0	0	1	1	1	0	0	1	0	1	0	0	1	1	1	BLACK OR AFRICAN AMERICAN
PT1480	1	1	1	0	0	0	0	0	0	0	1	1	1	0	0	0	1	0	0	0	1	1	0	1	BLACK OR AFRICAN AMERICAN
PT1481	1	1	1	1	0	0	0	0	0	1	0	1	0	0	0	0	1	0	1	0	0	1	1	0	WHITE
PT1482	1	1	1	1	0	0	0	0	0	1	0	1	1	1	0	0	1	0	1	0	0	1	1	0	BLACK OR AFRICAN AMERICAN
PT1484	1	1	1	1	0	0	0	0	0	1	0	1	1	1	0	0	1	0	1	0	0	1	1	1	BLACK OR AFRICAN AMERICAN
PT1485	1	1	1	0	1	0	0	0	0	1	1	1	1	0	0	0	1	0	0	1	1	1	0	0	WHITE
PT1487	1	1	1	0	0	0	0	0	0	1	1	1	1	1	0	0	1	0	0	0	1	1	0	0	WHITE
PT1488	1	1	1	1	0	0	0	0	0	1	0	1	1	1	0	0	1	0	1	0	0	1	1	0	BLACK OR AFRICAN AMERICAN
PT1490	1	1	1	0	0	0	0	0	0	0	1	1	1	0	0	1	1	0	0	0	1	1	0	0	WHITE
PT1491	1	1	1	1	0	0	0	0	0	0	1	1	1	1	0	0	1	0	1	0	0	1	1	1	WHITE
PT1498	1	1	1	0	1	1	0	0	0	0	0	1	1	1	0	0	1	0	0	1	1	1	0	0	WHITE
PT1503	1	1	1	1	0	0	0	0	0	0	0	1	1	1	1	0	1	0	1	0	0	1	1	0	WHITE
PT1504	1	1	1	1	0	0	0	0	0	1	0	1	1	1	0	0	1	0	1	0	0	1	1	0	WHITE
PT1509	1	1	1	1	0	0	0	0	0	1	1	1	1	0	0	0	1	0	1	0	0	1	1	0	BLACK OR AFRICAN AMERICAN
PT1511	1	1	1	1	0	0	0	0	0	0	1	1	1	1	0	0	1	0	1	0	0	1	1	0	BLACK OR AFRICAN AMERICAN
PT1512	1	1	1	1	0	0	0	0	0	1	0	1	0	0	0	0	1	0	1	0	0	1	1	1	WHITE
PT1517	1	1	1	1	1	0	0	0	0	0	1	1	1	1	0	0	1	0	1	1	0	1	1	0	WHITE
PT1521	1	1	1	1	0	0	0	0	0	0	1	1	1	1	0	0	1	0	1	0	0	1	1	0	WHITE
PT1524	1	1	1	0	0	0	0	0	0	1	0	1	1	1	1	0	1	0	0	0	1	1	0	0	BLACK OR AFRICAN AMERICAN
PT1526	1	1	1	1	0	0	0	0	0	0	1	1	1	1	0	0	1	0	1	0	0	1	1	1	WHITE
PT1531	1	1	1	0	0	0	0	0	0	1	0	1	1	1	1	0	1	0	0	0	1	1	0	1	BLACK OR AFRICAN AMERICAN
PT1533	1	1	1	0	1	0	0	0	0	0	1	1	1	1	0	0	1	0	0	1	1	1	0	0	WHITE
PT1536	1	1	1	0	0	0	0	0	0	1	0	1	0	0	0	0	1	0	0	0	1	1	0	0	WHITE
PT1537	1	1	1	1	0	0	0	0	0	0	0	1	1	0	0	0	1	0	1	0	0	1	1	1	BLACK OR AFRICAN AMERICAN
PT1540	1	1	1	1	0	0	0	0	0	0	0	0	0	0	1	0	1	0	1	0	0	1	1	1	BLACK OR AFRICAN AMERICAN
PT1547	1	1	1	1	0	0	0	0	0	1	0	1	1	1	0	0	1	0	1	0	0	1	1	1	WHITE
PT1549	1	1	1	1	0	0	0	0	0	1	0	1	1	1	0	0	1	0	1	0	0	1	1	1	BLACK OR AFRICAN AMERICAN
PT1550	1	1	1	0	0	0	0	0	0	1	0	1	1	1	1	0	1	0	0	0	1	1	0	1	BLACK OR AFRICAN AMERICAN
PT1551	1	1	1	1	0	0	0	0	0	1	0	1	1	0	0	0	1	0	1	0	0	1	1	1	BLACK OR AFRICAN AMERICAN
PT1553	1	1	1	1	0	0	0	0	0	1	1	1	1	0	1	0	1	0	1	0	0	1	1	1	WHITE
PT0370	1	2	1	1	0	0	0	0	0	1	0	1	1	0	1	0	1	0	1	0	0	1	1	1	BLACK OR AFRICAN AMERICAN
PT0388	1	2	1	1	0	0	0	0	0	1	0	1	1	1	0	1	1	0	1	0	0	1	1	1	WHITE
PT0390	1	2	1	1	0	0	0	0	0	1	0	1	0	0	0	0	1	0	1	0	0	1	1	1	BLACK OR AFRICAN AMERICAN
PT0399	1	2	1	1	0	0	0	0	0	1	0	1	1	0	1	1	1	0	1	0	0	1	1	1	WHITE
PT0410	1	2	1	1	0	0	0	0	0	1	0	1	1	1	1	0	1	0	1	0	0	1	1	1	BLACK OR AFRICAN AMERICAN
PT0412	1	2	1	1	0	0	0	0	0	1	0	1	1	1	1	1	1	0	1	0	0	1	1	1	WHITE
PT0415	1	2	1	1	0	0	0	0	0	1	0	1	1	1	0	0	1	0	1	0	0	1	1	1	BLACK OR AFRICAN AMERICAN
PT0424	1	2	1	0	0	1	0	0	0	1	0	1	1	1	0	1	1	0	0	1	1	1	0	1	BLACK OR AFRICAN AMERICAN
PT0445	1	2	1	1	0	0	0	0	0	0	0	0	0	0	0	0	1	0	1	0	0	1	1	1	BLACK OR AFRICAN AMERICAN
PT0446	1	2	1	1	0	0	0	0	0	1	0	1	1	0	0	0	1	0	1	0	0	1	1	1	WHITE
PT0461	1	2	1	1	0	0	0	0	0	1	0	1	1	1	1	1	1	0	1	0	0	1	1	1	BLACK OR AFRICAN AMERICAN
PT0505	1	2	1	1	0	0	0	0	0	1	0	1	1	0	1	0	1	0	1	0	0	1	1	1	BLACK OR AFRICAN AMERICAN
PT0898	1	2	1	1	0	0	0	0	0	1	0	1	1	1	0	0	1	0	1	0	0	1	1	1	BLACK OR AFRICAN AMERICAN
PT0907	1	2	1	0	0	0	0	0	0	0	0	1	1	1	1	0	1	0	0	0	1	1	0	1	BLACK OR AFRICAN AMERICAN
PT0919	1	2	1	1	0	0	0	0	0	1	1	1	1	1	0	1	1	0	1	0	0	1	1	1	AMERICAN INDIAN OR ALASKA NATIVE
PT0932	1	2	1	1	0	0	0	0	0	1	0	1	1	1	0	0	1	0	1	0	0	1	1	1	WHITE
PT0933	1	2	1	1	0	0	0	0	0	0	0	0	0	0	0	1	1	0	1	0	0	1	1	1	BLACK OR AFRICAN AMERICAN
PT0934	1	2	1	0	0	0	0	0	0	0	0	1	0	0	0	0	1	0	0	0	1	1	0	1	BLACK OR AFRICAN AMERICAN
PT0939	1	2	1	1	0	0	0	0	0	1	0	1	1	0	0	0	1	0	1	0	0	1	1	1	BLACK OR AFRICAN AMERICAN
PT0955	1	2	1	1	0	0	0	0	0	1	0	1	1	1	1	0	1	0	1	0	0	1	1	1	WHITE
PT0960	1	2	1	1	0	0	0	0	0	1	0	1	1	0	1	0	1	0	1	0	0	1	1	1	BLACK OR AFRICAN AMERICAN
PT0970	1	2	1	1	0	0	0	0	0	1	0	1	1	1	0	0	1	0	1	0	0	1	1	1	WHITE
PT0972	1	2	1	1	0	0	0	0	0	1	1	1	1	1	1	1	1	0	1	0	0	1	1	1	BLACK OR AFRICAN AMERICAN
PT0981	1	2	1	1	0	0	0	0	0	1	0	1	1	1	0	1	1	0	1	0	0	1	1	1	BLACK OR AFRICAN AMERICAN
PT0982	1	2	1	0	0	1	1	1	1	0	1	1	0	0	0	0	1	0	0	1	1	1	0	1	WHITE
PT0983	1	2	1	1	0	0	0	0	0	0	0	1	0	0	0	0	1	0	1	0	0	1	1	1	BLACK OR AFRICAN AMERICAN
PT0989	1	2	1	1	0	0	0	0	0	1	1	1	1	1	1	1	1	0	1	0	0	1	1	1	BLACK OR AFRICAN AMERICAN
PT1014	1	2	1	1	0	0	0	0	0	0	0	1	1	1	1	1	1	0	1	0	0	1	1	1	BLACK OR AFRICAN AMERICAN
PT1037	1	2	1	1	0	0	0	0	0	1	0	1	1	1	1	0	1	0	1	0	0	1	1	1	WHITE
PT1410	1	2	1	1	0	1	1	0	0	1	0	1	1	1	0	0	1	0	1	1	0	1	1	1	BLACK OR AFRICAN AMERICAN
PT1412	1	2	1	1	0	0	0	0	0	1	0	1	1	1	1	0	1	0	1	0	0	1	1	1	BLACK OR AFRICAN AMERICAN
PT1414	1	2	1	1	0	0	0	0	0	1	0	1	1	1	1	1	1	0	1	0	0	1	1	1	BLACK OR AFRICAN AMERICAN
PT1419	1	2	1	1	0	0	0	0	0	1	0	1	1	1	1	0	1	0	1	0	0	1	1	1	WHITE
PT1431	1	2	1	1	0	0	0	0	0	1	0	1	1	1	0	0	1	0	1	0	0	1	1	1	BLACK OR AFRICAN AMERICAN
PT1443	1	2	1	1	0	0	0	0	0	1	1	1	1	1	0	1	1	0	1	0	0	1	1	1	BLACK OR AFRICAN AMERICAN
PT1458	1	2	1	1	0	0	0	0	0	1	0	1	1	1	1	0	1	0	1	0	0	1	1	1	WHITE
PT1466	1	2	1	1	0	0	0	0	0	0	1	1	0	0	1	0	1	0	1	0	0	1	1	1	BLACK OR AFRICAN AMERICAN
PT1472	1	2	1	1	0	0	0	0	0	0	0	1	1	1	1	1	1	0	1	0	0	1	1	1	BLACK OR AFRICAN AMERICAN
PT1499	1	2	1	1	0	0	0	0	0	1	1	1	1	1	1	0	1	0	1	0	0	1	1	1	WHITE
PT1507	1	2	1	1	0	0	0	0	0	1	0	1	1	1	1	1	1	0	1	0	0	1	1	1	WHITE
PT1510	1	2	1	1	0	0	0	0	0	1	0	1	1	1	0	0	1	0	1	0	0	1	1	1	WHITE
PT1535	1	2	1	1	0	0	0	0	0	1	1	1	1	1	0	0	1	0	1	0	0	1	1	1	BLACK OR AFRICAN AMERICAN
PT1539	1	2	1	0	0	0	0	0	0	0	0	1	1	1	1	1	1	0	0	0	1	1	0	1	WHITE
PT1557	1	2	1	1	0	0	0	0	0	1	0	0	0	0	1	1	1	0	1	0	0	1	1	1	BLACK OR AFRICAN AMERICAN
PT0368	1	3	1	0	0	0	0	0	0	0	0	1	1	1	0	0	1	0	0	0	1	1	0	0	BLACK OR AFRICAN AMERICAN
PT0373	1	3	1	1	1	0	1	0	0	0	1	1	1	1	1	0	1	0	1	1	0	1	1	0	BLACK OR AFRICAN AMERICAN
PT0378	1	3	1	0	0	0	0	0	0	1	0	1	1	1	0	0	1	0	0	0	1	1	0	0	WHITE
PT0380	1	3	1	1	1	0	1	0	0	0	0	1	1	1	0	0	1	0	1	1	0	1	1	0	BLACK OR AFRICAN AMERICAN
PT0386	1	3	1	1	0	0	0	0	0	0	0	1	1	1	0	0	1	0	1	0	0	1	1	0	BLACK OR AFRICAN AMERICAN
PT0397	1	3	1	0	0	0	0	0	0	1	1	1	1	0	0	0	1	0	0	0	1	1	0	0	WHITE
PT0398	1	3	1	0	0	0	0	0	0	1	1	1	1	1	1	0	1	0	0	0	1	1	0	0	WHITE
PT0400	1	3	1	1	0	1	0	0	0	1	0	1	1	1	1	0	1	0	1	1	0	1	1	0	BLACK OR AFRICAN AMERICAN
PT0414	1	3	1	0	1	1	0	0	0	1	1	1	1	0	0	0	1	0	0	1	1	1	0	0	BLACK OR AFRICAN AMERICAN
PT0425	1	3	1	0	0	0	0	0	0	1	0	1	1	1	0	0	1	0	0	0	1	1	0	0	BLACK OR AFRICAN AMERICAN
PT0430	1	3	1	0	0	0	0	0	0	1	1	1	1	1	1	0	1	0	0	0	1	1	0	0	WHITE
PT0431	1	3	1	1	0	0	0	0	0	0	1	1	0	0	0	1	1	0	1	0	0	1	1	0	WHITE
PT0432	1	3	1	1	0	0	0	0	0	1	0	1	1	0	1	0	1	0	1	0	0	1	1	0	BLACK OR AFRICAN AMERICAN
PT0433	1	3	1	1	0	0	0	0	0	1	0	1	1	1	0	0	1	0	1	0	0	1	1	0	BLACK OR AFRICAN AMERICAN
PT0434	1	3	1	0	1	0	0	0	0	0	1	1	1	1	0	0	1	0	0	1	1	1	0	0	BLACK OR AFRICAN AMERICAN
PT0440	1	3	1	1	0	0	0	0	0	1	0	1	1	1	0	0	1	0	1	0	0	1	1	0	BLACK OR AFRICAN AMERICAN
PT0447	1	3	1	1	0	0	0	0	0	1	0	1	1	1	1	1	1	0	1	0	0	1	1	0	BLACK OR AFRICAN AMERICAN
PT0451	1	3	1	0	1	1	0	0	0	1	1	1	1	1	0	0	1	0	0	1	1	1	0	0	BLACK OR AFRICAN AMERICAN
PT0452	1	3	1	0	0	0	0	0	0	1	0	1	1	1	1	0	1	0	0	0	1	1	0	0	BLACK OR AFRICAN AMERICAN
PT0454	1	3	1	0	0	0	0	0	0	0	1	1	1	1	0	1	1	0	0	0	1	1	0	0	BLACK OR AFRICAN AMERICAN
PT0455	1	3	1	1	0	0	0	0	0	1	0	1	1	1	0	0	1	0	1	0	0	1	1	0	BLACK OR AFRICAN AMERICAN
PT0462	1	3	1	1	0	0	0	0	0	1	0	1	0	0	0	0	1	0	1	0	0	1	1	0	BLACK OR AFRICAN AMERICAN
PT0468	1	3	1	0	0	0	0	0	0	0	1	1	1	1	0	0	1	0	0	0	1	1	0	0	BLACK OR AFRICAN AMERICAN
PT0473	1	3	1	1	0	0	0	0	0	1	0	1	1	1	1	0	1	0	1	0	0	1	1	0	WHITE
PT0475	1	3	1	0	1	0	1	0	0	1	0	1	1	1	0	0	1	0	0	1	1	1	0	0	WHITE
PT0476	1	3	1	0	1	0	0	0	0	1	0	1	1	1	0	0	1	0	0	1	1	1	0	0	BLACK OR AFRICAN AMERICAN
PT0478	1	3	1	1	0	0	0	0	0	0	0	1	1	1	0	0	1	0	1	0	0	1	1	0	WHITE
PT0488	1	3	1	1	0	0	0	0	0	1	1	1	1	1	1	0	1	0	1	0	0	1	1	0	WHITE
PT0496	1	3	1	1	0	0	0	0	0	0	0	1	1	0	0	0	1	0	1	0	0	1	1	0	BLACK OR AFRICAN AMERICAN
PT0502	1	3	1	0	0	0	0	0	0	0	1	1	1	0	0	0	1	0	0	0	1	1	0	0	BLACK OR AFRICAN AMERICAN
PT0513	1	3	1	0	0	0	0	0	0	0	1	1	1	0	1	0	1	0	0	0	1	1	0	0	WHITE
PT0710	1	3	1	0	1	1	1	0	1	1	0	1	1	1	0	0	1	0	0	1	1	1	1	0	BLACK OR AFRICAN AMERICAN
PT0887	1	3	1	0	0	1	0	0	0	0	1	1	0	0	0	0	1	0	0	1	1	1	0	0	WHITE
PT0888	1	3	1	1	0	1	0	0	0	1	1	1	1	1	0	0	1	0	1	1	0	1	1	0	BLACK OR AFRICAN AMERICAN
PT0890	1	3	1	0	0	0	0	0	0	1	0	1	1	1	0	0	1	0	0	0	1	1	0	0	BLACK OR AFRICAN AMERICAN
PT0899	1	3	1	0	1	1	0	1	0	1	0	1	1	1	0	0	1	0	0	1	1	1	1	0	WHITE
PT0902	1	3	1	0	0	1	0	0	0	0	0	1	1	1	0	0	1	0	0	1	1	1	0	0	WHITE
PT0904	1	3	1	0	0	0	0	0	0	1	0	1	1	1	0	0	1	0	0	0	1	1	0	0	WHITE
PT0905	1	3	1	0	0	0	0	0	0	1	0	1	1	1	0	0	1	0	0	0	1	1	0	0	WHITE
PT0906	1	3	1	1	0	0	0	0	0	1	1	1	1	0	1	1	1	0	1	0	0	1	1	0	BLACK OR AFRICAN AMERICAN
PT0909	1	3	1	1	0	1	0	0	0	1	0	1	1	0	0	0	1	0	1	1	0	1	1	0	WHITE
PT0910	1	3	1	0	0	1	0	0	0	1	1	1	1	1	0	0	1	0	0	1	1	1	0	0	BLACK OR AFRICAN AMERICAN
PT0911	1	3	1	0	0	0	0	0	0	0	0	1	1	1	1	0	1	0	0	0	1	1	0	0	WHITE
PT0914	1	3	1	0	0	0	0	0	0	0	1	1	1	1	1	0	1	0	0	0	1	1	0	0	DECLINED TO ANSWER
PT0920	1	3	1	0	0	0	0	0	0	0	0	1	0	0	0	0	1	0	0	0	1	1	0	0	WHITE
PT0922	1	3	1	0	0	1	0	0	0	1	0	1	1	1	1	0	1	0	0	1	1	1	0	0	WHITE
PT0923	1	3	1	1	0	0	0	0	0	0	0	1	0	0	0	0	1	0	1	0	0	1	1	0	BLACK OR AFRICAN AMERICAN
PT0924	1	3	1	0	1	1	1	1	0	0	0	1	0	0	0	0	1	0	0	1	1	1	1	0	WHITE
PT0926	1	3	1	1	0	0	0	0	0	1	0	1	1	1	0	0	1	0	1	0	0	1	1	0	WHITE
PT0927	1	3	1	1	0	1	0	0	0	1	0	1	1	1	1	0	1	0	1	1	0	1	1	0	BLACK OR AFRICAN AMERICAN
PT0945	1	3	1	1	0	0	0	0	0	1	0	1	1	1	1	0	1	0	1	0	0	1	1	0	BLACK OR AFRICAN AMERICAN
PT0947	1	3	1	1	0	0	0	0	0	0	1	1	1	1	0	0	1	0	1	0	0	1	1	0	WHITE
PT0948	1	3	1	0	0	1	0	0	0	1	0	1	1	1	1	0	1	0	0	1	1	1	0	0	BLACK OR AFRICAN AMERICAN
PT0956	1	3	1	0	1	0	0	0	0	0	1	1	1	1	0	0	1	0	0	1	1	1	0	0	BLACK OR AFRICAN AMERICAN
PT0961	1	3	1	0	0	0	0	0	0	1	1	1	1	0	0	1	1	0	0	0	1	1	0	0	WHITE
PT0967	1	3	1	1	0	0	0	0	0	1	0	1	1	1	0	0	1	0	1	0	0	1	1	0	BLACK OR AFRICAN AMERICAN
PT0973	1	3	1	0	1	1	0	0	0	0	1	1	1	1	0	0	1	0	0	1	1	1	0	0	WHITE
PT0974	1	3	1	0	0	0	0	0	0	0	1	1	0	0	0	0	1	0	0	0	1	1	0	0	BLACK OR AFRICAN AMERICAN
PT0975	1	3	1	1	0	0	0	0	0	1	0	1	1	0	0	0	1	0	1	0	0	1	1	0	WHITE
PT0976	1	3	1	0	0	0	0	0	0	1	0	1	1	1	1	0	1	0	0	0	1	1	0	0	BLACK OR AFRICAN AMERICAN
PT0977	1	3	1	0	0	0	0	0	0	1	0	1	1	1	1	0	1	0	0	0	1	1	0	0	WHITE
PT0980	1	3	1	1	0	0	0	0	0	0	0	1	0	0	0	0	1	0	1	0	0	1	1	0	WHITE
PT0985	1	3	1	0	1	0	0	0	0	1	1	1	1	1	0	0	1	0	0	1	1	1	0	0	WHITE
PT0986	1	3	1	0	1	0	0	0	0	1	0	1	1	1	0	0	1	0	0	1	1	1	0	0	BLACK OR AFRICAN AMERICAN
PT0988	1	3	1	0	1	1	0	0	0	0	1	1	1	1	0	0	1	0	0	1	1	1	0	0	BLACK OR AFRICAN AMERICAN
PT0990	1	3	1	1	0	0	0	0	0	1	1	1	1	1	0	0	1	0	1	0	0	1	1	0	BLACK OR AFRICAN AMERICAN
PT0992	1	3	1	0	1	1	0	0	0	1	1	1	1	0	0	0	1	0	0	1	1	1	0	0	BLACK OR AFRICAN AMERICAN
PT0993	1	3	1	0	1	1	0	1	0	0	1	1	1	1	0	0	1	0	0	1	1	1	1	0	WHITE
PT0995	1	3	1	0	0	1	0	0	0	0	0	1	1	0	0	0	1	0	0	1	1	1	0	0	WHITE
PT0999	1	3	1	1	0	1	0	0	0	1	0	1	1	0	0	0	1	0	1	1	0	1	1	0	BLACK OR AFRICAN AMERICAN
PT1006	1	3	1	1	0	0	0	0	0	0	0	1	0	0	1	0	1	0	1	0	0	1	1	0	WHITE
PT1008	1	3	1	0	0	0	0	0	0	1	1	1	1	1	0	0	1	0	0	0	1	1	0	0	WHITE
PT1011	1	3	1	0	0	0	0	0	0	0	1	1	1	1	0	0	1	0	0	0	1	1	0	0	WHITE
PT1015	1	3	1	1	1	1	0	0	0	1	1	1	1	1	1	0	1	0	1	1	0	1	1	0	BLACK OR AFRICAN AMERICAN
PT1019	1	3	1	1	0	0	0	0	0	1	1	1	1	0	1	0	1	0	1	0	0	1	1	0	WHITE
PT1022	1	3	1	0	0	0	0	0	0	1	1	1	1	0	1	0	1	0	0	0	1	1	0	0	WHITE
PT1024	1	3	1	1	0	0	0	0	0	1	0	1	0	1	1	0	1	0	1	0	0	1	1	0	WHITE
PT1025	1	3	1	1	0	0	0	0	0	1	1	1	1	1	0	0	1	0	1	0	0	1	1	0	WHITE
PT1032	1	3	1	0	1	1	1	0	0	0	0	0	0	0	0	0	1	0	0	1	0	1	1	0	BLACK OR AFRICAN AMERICAN
PT1033	1	3	1	0	0	0	0	0	0	1	0	1	1	0	0	0	1	0	0	0	1	1	0	0	WHITE
PT1034	1	3	1	1	0	0	0	0	0	1	1	1	1	0	0	0	1	0	1	0	0	1	1	0	BLACK OR AFRICAN AMERICAN
PT1036	1	3	1	1	0	0	0	0	0	1	0	1	1	1	1	0	1	0	1	0	0	1	1	0	BLACK OR AFRICAN AMERICAN
PT1409	1	3	1	0	0	0	0	0	0	0	1	1	0	0	0	0	1	0	0	0	1	1	0	0	WHITE
PT1411	1	3	1	0	1	0	0	0	0	0	1	1	1	0	0	0	1	0	0	1	1	1	0	0	BLACK OR AFRICAN AMERICAN
PT1413	1	3	1	1	0	0	0	0	0	0	0	1	1	0	0	0	1	0	1	0	0	1	1	0	BLACK OR AFRICAN AMERICAN
PT1420	1	3	1	0	0	0	0	0	0	0	0	1	1	1	0	0	1	0	0	0	1	1	0	0	WHITE
PT1437	1	3	1	1	0	0	0	0	0	1	0	1	1	1	0	0	1	0	1	0	0	1	1	0	BLACK OR AFRICAN AMERICAN
PT1439	1	3	1	0	0	0	0	0	0	1	1	1	1	1	0	0	1	0	0	0	1	1	0	0	WHITE
PT1444	1	3	1	0	1	1	0	0	0	0	1	1	1	1	0	0	1	0	0	1	1	1	0	0	BLACK OR AFRICAN AMERICAN
PT1445	1	3	1	1	0	0	0	0	0	1	1	1	1	1	0	0	1	0	1	0	0	1	1	0	BLACK OR AFRICAN AMERICAN
PT1448	1	3	1	1	0	0	0	0	0	1	0	1	0	1	0	0	1	0	1	0	0	1	1	0	DECLINED TO ANSWER
PT1453	1	3	1	1	0	0	0	0	0	1	0	0	0	0	1	0	1	0	1	0	0	1	1	0	BLACK OR AFRICAN AMERICAN
PT1459	1	3	1	1	0	0	0	0	0	0	0	1	0	0	0	0	1	0	1	0	0	1	1	0	BLACK OR AFRICAN AMERICAN
PT1460	1	3	1	0	1	1	0	0	0	1	0	1	1	0	0	0	1	0	0	1	1	1	0	0	BLACK OR AFRICAN AMERICAN
PT1465	1	3	1	1	0	0	0	0	0	1	0	1	1	0	1	0	1	0	1	0	0	1	1	0	BLACK OR AFRICAN AMERICAN
PT1468	1	3	1	1	0	0	0	0	0	1	0	1	1	1	0	1	1	0	1	0	0	1	1	0	BLACK OR AFRICAN AMERICAN
PT1470	1	3	1	1	0	0	0	0	0	0	0	1	0	0	0	0	1	0	1	0	0	1	1	0	BLACK OR AFRICAN AMERICAN
PT1496	1	3	1	1	0	0	0	0	0	1	0	1	1	1	1	0	1	0	1	0	0	1	1	0	BLACK OR AFRICAN AMERICAN
PT1502	1	3	1	1	0	0	0	0	0	1	1	1	1	1	0	1	1	0	1	0	0	1	1	0	BLACK OR AFRICAN AMERICAN
PT1505	1	3	1	1	0	0	0	0	0	0	1	1	0	1	0	0	1	0	1	0	0	1	1	0	BLACK OR AFRICAN AMERICAN
PT1508	1	3	1	0	1	0	0	0	0	0	1	1	1	1	0	0	1	0	0	1	1	1	0	0	BLACK OR AFRICAN AMERICAN
PT1513	1	3	1	0	1	1	1	0	0	1	0	1	0	0	0	0	1	0	0	1	1	1	1	0	WHITE
PT1515	1	3	1	0	0	0	0	0	0	1	1	1	1	1	0	0	1	0	0	0	1	1	0	0	WHITE
PT1516	1	3	1	1	0	0	0	0	0	1	0	1	1	1	0	0	1	0	1	0	0	1	1	0	BLACK OR AFRICAN AMERICAN
PT1522	1	3	1	0	0	1	0	1	0	0	0	1	1	0	0	0	1	0	0	1	1	1	0	0	WHITE
PT1528	1	3	1	1	0	0	0	0	0	1	0	1	1	0	1	0	1	0	1	0	0	1	1	0
PT1529	1	3	1	0	0	0	0	0	0	1	0	1	1	1	0	0	1	0	0	0	1	1	0	0
PT1544	1	3	1	1	0	0	0	0	0	1	0	1	1	0	0	0	1	0	1	0	0	1	1	0	BLACK OR AFRICAN AMERICAN
PT1545	1	3	1	1	0	0	0	0	0	0	0	1	1	0	0	0	1	0	1	0	0	1	1	0	WHITE
PT1554	1	3	1	0	0	1	0	0	0	0	0	1	1	1	0	1	1	0	0	1	1	1	0	0	WHITE
PT1555	1	3	1	0	0	1	1	0	0	0	0	1	0	0	0	0	1	0	0	1	1	1	0	0	BLACK OR AFRICAN AMERICAN
PT1558	1	3	1	0	1	1	0	0	0	1	1	1	1	1	0	0	1	0	0	1	1	1	0	0	BLACK OR AFRICAN AMERICAN
PT1559	1	3	1	0	0	0	0	0	0	0	0	1	1	1	0	1	1	0	0	0	1	1	0	0	BLACK OR AFRICAN AMERICAN
PT0562	1	4	1	0	0	0	0	0	0	0	0	1	1	1	0	0	0	0	0	0	1	1	0	1
PT1104	1	4	1	0	0	1	1	0	0	0	0	1	1	0	0	0	1	0	0	1	1	1	0	0	BLACK OR AFRICAN AMERICAN
PT0002	1	5	1	0	0	0	0	0	0	1	1	1	1	0	1	1	1	0	0	0	1	1	0	0	WHITE
PT0004	1	5	1	0	1	1	0	0	0	0	0	1	1	1	0	0	1	0	0	1	1	1	0	0	BLACK OR AFRICAN AMERICAN
PT0005	1	5	1	0	0	0	0	0	0	1	0	1	1	1	1	0	1	0	0	0	1	1	0	1	WHITE
PT0006	1	5	1	0	0	0	0	0	0	1	1	1	0	0	0	0	1	0	0	0	1	1	0	1	WHITE
PT0007	1	5	1	0	0	0	0	0	0	1	1	1	1	1	0	0	1	0	0	0	1	1	0	0	WHITE
PT0008	1	5	1	0	1	1	0	0	0	0	0	1	1	0	0	0	1	0	0	1	1	1	0	1
PT0010	1	5	1	0	1	1	0	0	0	0	1	0	0	0	0	0	1	0	0	1	0	1	0	0	WHITE
PT0011	1	5	1	0	0	0	0	0	0	0	1	1	1	1	0	0	1	0	0	0	1	1	0	1	BLACK OR AFRICAN AMERICAN
PT0012	1	5	1	0	0	1	0	1	0	1	0	1	1	1	0	0	1	0	0	1	1	1	0	0	BLACK OR AFRICAN AMERICAN
PT0014	1	5	1	0	0	0	0	0	0	1	0	1	1	1	0	0	1	0	0	0	1	1	0	0	WHITE
PT0015	1	5	1	0	0	0	0	0	0	0	1	1	1	1	0	1	1	0	0	0	1	1	0	1	WHITE
PT0016	1	5	1	0	0	0	0	0	0	0	1	1	1	0	0	1	1	0	0	0	1	1	0	0	BLACK OR AFRICAN AMERICAN
PT0017	1	5	1	0	0	0	0	0	0	0	0	1	1	1	0	0	1	0	0	0	1	1	0	0	WHITE
PT0018	1	5	1	0	1	1	0	0	0	1	0	0	0	0	0	0	1	0	0	1	0	1	0	1	BLACK OR AFRICAN AMERICAN
PT0019	1	5	1	0	0	1	0	0	0	0	0	1	1	0	0	0	1	0	0	1	1	1	0	1	BLACK OR AFRICAN AMERICAN
PT0020	1	5	1	0	0	1	1	0	0	1	1	0	0	0	0	0	1	0	0	1	0	1	0	0	WHITE
PT0021	1	5	1	0	1	1	1	0	0	0	1	1	1	1	0	0	1	0	0	1	1	1	1	0	WHITE
PT0022	1	5	1	0	0	0	0	0	0	1	0	1	1	1	1	1	1	0	0	0	1	1	0	1	BLACK OR AFRICAN AMERICAN
PT0023	1	5	1	0	1	1	0	0	0	0	0	0	0	0	0	0	1	0	0	1	0	1	0	0	WHITE
PT0024	1	5	1	0	0	0	0	0	0	1	0	1	1	1	0	0	1	0	0	0	1	1	0	1	WHITE
PT0025	1	5	1	0	0	0	0	0	0	1	0	1	0	1	0	0	1	0	0	0	1	1	0	0	WHITE
PT0026	1	5	1	0	1	1	0	1	0	0	0	1	1	1	0	0	1	0	0	1	1	1	1	1	BLACK OR AFRICAN AMERICAN
PT0027	1	5	1	0	0	0	0	0	0	0	1	1	0	0	0	0	1	0	0	0	1	1	0	0	WHITE
PT0028	1	5	1	0	0	0	0	0	0	0	1	1	0	0	0	0	1	0	0	0	1	1	0	1	WHITE
PT0029	1	5	1	0	0	0	0	0	0	1	1	1	1	1	0	0	1	0	0	0	1	1	0	1	BLACK OR AFRICAN AMERICAN
PT0030	1	5	1	0	1	1	1	0	0	0	1	0	0	0	0	0	1	0	0	1	0	1	1	0	WHITE
PT0034	1	5	1	0	0	0	0	0	0	0	1	1	1	0	0	0	1	0	0	0	1	1	0	0	WHITE
PT0036	1	5	1	0	1	1	0	0	1	0	1	1	1	1	0	0	1	0	0	1	1	1	1	0	BLACK OR AFRICAN AMERICAN
PT0037	1	5	1	0	1	1	0	0	0	0	0	1	1	1	1	0	1	0	0	1	1	1	0	0	WHITE
PT0039	1	5	1	0	1	1	0	0	0	1	1	1	1	1	0	0	1	0	0	1	1	1	0	0	DECLINED TO ANSWER
PT0040	1	5	1	1	0	0	0	0	0	1	0	1	1	1	0	0	1	0	1	0	0	1	1	0	BLACK OR AFRICAN AMERICAN
PT0041	1	5	1	0	0	1	1	0	0	1	1	1	1	0	0	0	1	0	0	1	1	1	0	1	WHITE
PT0043	1	5	1	0	0	0	0	0	0	0	1	1	1	1	1	0	1	0	0	0	1	1	0	0	BLACK OR AFRICAN AMERICAN
PT0045	1	5	1	0	0	0	0	0	0	0	0	1	1	1	0	0	1	0	0	0	1	1	0	1	WHITE
PT0047	1	5	1	0	0	0	0	0	0	0	0	1	1	0	0	0	1	0	0	0	1	1	0	1	WHITE
PT0048	1	5	1	0	1	0	0	1	0	0	1	1	1	1	0	0	1	0	0	1	1	1	0	0	BLACK OR AFRICAN AMERICAN
PT0049	1	5	1	0	0	0	0	0	0	0	1	1	0	0	1	0	1	0	0	0	1	1	0	1	NATIVE HAWAIIAN OR OTHER PACIFIC ISLANDER
PT0051	1	5	1	0	1	0	1	0	0	1	0	1	0	0	0	0	1	0	0	1	1	1	0	0	BLACK OR AFRICAN AMERICAN
PT0053	1	5	1	0	1	1	0	0	0	1	1	0	0	0	0	0	1	0	0	1	0	1	0	0	WHITE
PT0054	1	5	1	0	1	1	0	0	0	1	0	1	1	0	0	0	1	0	0	1	1	1	0	0	WHITE
PT0056	1	5	1	0	0	0	0	0	0	0	1	1	1	1	0	0	1	0	0	0	1	1	0	0	WHITE
PT0059	1	5	1	0	0	0	0	0	0	0	1	1	1	1	0	0	1	0	0	0	1	1	0	0	NATIVE HAWAIIAN OR OTHER PACIFIC ISLANDER
PT0060	1	5	1	0	0	0	0	0	0	0	1	1	1	1	0	0	1	0	0	0	1	1	0	0	WHITE
PT0061	1	5	1	0	0	0	0	0	0	0	0	1	1	1	0	0	1	0	0	0	1	1	0	0	BLACK OR AFRICAN AMERICAN
PT0062	1	5	1	0	0	1	0	0	0	1	0	1	1	1	0	1	1	0	0	1	1	1	0	0	WHITE
PT0063	1	5	1	0	0	1	1	0	0	1	1	1	1	1	0	1	1	0	0	1	1	1	0	0	WHITE
PT0064	1	5	1	0	1	1	0	0	0	0	1	0	0	0	0	0	1	0	0	1	0	1	0	0	WHITE
PT0065	1	5	1	0	0	0	0	0	0	1	1	1	1	0	0	0	1	0	0	0	1	1	0	1	BLACK OR AFRICAN AMERICAN
PT0067	1	5	1	0	0	0	0	0	0	0	1	1	1	1	0	0	1	0	0	0	1	1	0	0	WHITE
PT0068	1	5	1	0	0	0	0	0	0	1	0	1	1	1	1	1	1	0	0	0	1	1	0	0	WHITE
PT0069	1	5	1	0	0	0	0	0	0	1	0	1	1	1	0	0	1	0	0	0	1	1	0	1	WHITE
PT0070	1	5	1	0	0	0	0	0	0	0	1	1	1	0	1	0	1	0	0	0	1	1	0	0	BLACK OR AFRICAN AMERICAN
PT0071	1	5	1	0	0	0	0	0	0	1	0	1	1	1	0	0	1	0	0	0	1	1	0	1	WHITE
PT0073	1	5	1	0	0	1	0	0	0	0	1	1	1	0	0	0	1	0	0	1	1	1	0	0	WHITE
PT0074	1	5	1	0	0	1	0	1	0	1	1	1	1	1	1	0	1	0	0	1	1	1	0	1	WHITE
PT0075	1	5	1	0	0	0	0	0	0	1	0	1	1	1	1	0	1	0	0	0	1	1	0	1	WHITE
PT0076	1	5	1	0	0	0	0	0	0	0	1	1	1	1	0	0	1	0	0	0	1	1	0	1	WHITE
PT0077	1	5	1	0	0	1	0	0	0	1	1	0	0	0	0	0	1	0	0	1	0	1	0	1	BLACK OR AFRICAN AMERICAN
PT0078	1	5	1	0	0	1	1	0	0	1	1	0	0	0	1	0	1	0	0	1	0	1	0	1	WHITE
PT0080	1	5	1	0	0	0	0	0	0	0	1	1	1	0	0	0	1	0	0	0	1	1	0	0	BLACK OR AFRICAN AMERICAN
PT0082	1	5	1	0	0	0	0	0	0	0	1	1	0	0	1	0	1	0	0	0	1	1	0	1	BLACK OR AFRICAN AMERICAN
PT0083	1	5	1	0	0	0	0	0	0	0	1	1	1	1	0	0	1	0	0	0	1	1	0	0	WHITE
PT0085	1	5	1	0	0	1	1	0	0	1	0	1	0	0	0	0	1	0	0	1	1	1	0	1	WHITE
PT0086	1	5	1	0	0	0	0	0	0	0	1	1	1	1	0	0	1	0	0	0	1	1	0	1	WHITE
PT0087	1	5	1	0	0	1	0	1	0	0	1	0	0	0	0	0	1	0	0	1	0	1	0	1	BLACK OR AFRICAN AMERICAN
PT0088	1	5	1	0	1	1	1	0	0	1	1	1	0	0	0	0	1	0	0	1	1	1	1	0	WHITE
PT0090	1	5	1	0	1	1	1	0	0	0	1	1	1	1	0	0	1	0	0	1	1	1	1	0	BLACK OR AFRICAN AMERICAN
PT0092	1	5	1	0	0	0	0	0	0	1	0	1	0	0	0	0	1	0	0	0	1	1	0	1	BLACK OR AFRICAN AMERICAN
PT0093	1	5	1	0	0	0	0	0	0	0	1	1	1	0	0	0	1	0	0	0	1	1	0	0	WHITE
PT0095	1	5	1	0	1	0	1	0	0	0	1	1	1	1	0	0	1	0	0	1	1	1	0	0	WHITE
PT0096	1	5	1	0	1	1	0	0	0	0	1	1	1	0	0	1	1	0	0	1	1	1	0	0	BLACK OR AFRICAN AMERICAN
PT0097	1	5	1	0	0	0	0	0	0	0	0	1	0	0	0	1	1	0	0	0	1	1	0	1
PT0098	1	5	1	0	0	0	0	0	0	1	1	1	1	0	0	0	1	0	0	0	1	1	0	1	WHITE
PT0099	1	5	1	0	1	1	0	0	0	0	1	1	1	1	0	0	1	0	0	1	1	1	0	0	WHITE
PT0100	1	5	1	0	0	0	0	0	0	0	1	1	1	1	0	0	1	0	0	0	1	1	0	0	BLACK OR AFRICAN AMERICAN
PT0101	1	5	1	0	1	1	0	0	0	1	1	1	1	1	1	0	1	0	0	1	1	1	0	0	BLACK OR AFRICAN AMERICAN
PT0103	1	5	1	0	0	0	0	0	0	1	1	1	1	1	0	1	1	0	0	0	1	1	0	0	WHITE
PT0105	1	5	1	0	0	0	0	0	0	1	0	1	1	1	0	0	1	0	0	0	1	1	0	1	WHITE
PT0106	1	5	1	0	1	1	1	0	0	0	1	1	1	1	0	0	1	0	0	1	1	1	1	0	BLACK OR AFRICAN AMERICAN
PT0108	1	5	1	0	0	0	0	0	0	0	1	1	1	1	0	0	1	0	0	0	1	1	0	0	WHITE
PT0109	1	5	1	0	0	0	0	0	0	0	0	1	1	1	0	0	1	0	0	0	1	1	0	0	NATIVE HAWAIIAN OR OTHER PACIFIC ISLANDER
PT0110	1	5	1	0	0	1	0	0	0	1	1	1	1	1	0	0	1	0	0	1	1	1	0	1	WHITE
PT0112	1	5	1	0	0	0	0	0	0	1	0	1	0	0	0	0	1	0	0	0	1	1	0	0	WHITE
PT0117	1	5	1	0	0	0	0	0	0	0	1	1	1	1	0	0	1	0	0	0	1	1	0	0	WHITE
PT0119	1	5	1	0	0	0	0	0	0	0	1	1	1	1	0	0	1	0	0	0	1	1	0	0	WHITE
PT0120	1	5	1	0	1	0	1	0	0	1	1	1	1	0	1	0	1	0	0	1	1	1	0	0	DECLINED TO ANSWER
PT0121	1	5	1	0	0	0	0	0	0	0	0	1	1	0	0	0	1	0	0	0	1	1	0	0	WHITE
PT0122	1	5	1	0	0	0	0	0	0	1	0	1	1	0	0	0	1	0	0	0	1	1	0	1	BLACK OR AFRICAN AMERICAN
PT0124	1	5	1	0	0	1	1	0	0	1	1	1	1	0	0	0	1	0	0	1	1	1	0	0	WHITE
PT0126	1	5	1	0	0	0	0	0	0	0	0	1	0	0	0	0	1	0	0	0	1	1	0	0	BLACK OR AFRICAN AMERICAN
PT0127	1	5	1	0	0	0	0	0	0	1	1	1	1	0	0	0	1	0	0	0	1	1	0	0	BLACK OR AFRICAN AMERICAN
PT0128	1	5	1	0	0	0	0	0	0	0	1	1	1	1	0	0	1	0	0	0	1	1	0	1	BLACK OR AFRICAN AMERICAN
PT0129	1	5	1	0	0	1	0	0	0	1	0	1	1	1	0	0	1	0	0	1	1	1	0	0	BLACK OR AFRICAN AMERICAN
PT0131	1	5	1	0	0	0	0	0	0	0	1	1	0	0	0	0	1	0	0	0	1	1	0	1	BLACK OR AFRICAN AMERICAN
PT0134	1	5	1	0	0	0	0	0	0	0	1	1	1	0	0	0	1	0	0	0	1	1	0	0	WHITE
PT0136	1	5	1	0	0	0	0	0	0	1	1	1	1	1	0	0	1	0	0	0	1	1	0	0	WHITE
PT0137	1	5	1	0	0	1	0	0	0	1	0	1	1	1	1	0	1	0	0	1	1	1	0	0	BLACK OR AFRICAN AMERICAN
PT0139	1	5	1	0	0	0	0	0	0	1	1	1	1	1	0	0	1	0	0	0	1	1	0	1
PT0140	1	5	1	0	1	0	0	0	0	1	1	1	1	1	0	0	1	0	0	1	1	1	0	0	BLACK OR AFRICAN AMERICAN
PT0141	1	5	1	0	0	1	0	0	0	0	1	1	1	0	0	0	1	0	0	1	1	1	0	1	WHITE
PT0142	1	5	1	0	0	0	0	0	0	1	0	1	1	1	1	1	1	0	0	0	1	1	0	0	BLACK OR AFRICAN AMERICAN
PT0143	1	5	1	0	0	1	0	0	0	0	1	1	1	1	0	0	1	0	0	1	1	1	0	0	WHITE
PT0144	1	5	1	0	0	0	0	0	0	1	1	1	1	1	0	0	1	0	0	0	1	1	0	0	BLACK OR AFRICAN AMERICAN
PT0145	1	5	1	0	1	0	1	0	0	0	0	1	0	0	0	0	1	0	0	1	1	1	0	0	BLACK OR AFRICAN AMERICAN
PT0146	1	5	1	0	0	0	0	0	0	0	1	1	0	0	0	0	1	0	0	0	1	1	0	0	BLACK OR AFRICAN AMERICAN
PT0149	1	5	1	0	0	0	0	0	0	0	1	1	1	1	0	0	1	0	0	0	1	1	0	0
PT0151	1	5	1	0	0	0	0	0	0	0	0	1	1	1	1	1	1	0	0	0	1	1	0	1	BLACK OR AFRICAN AMERICAN
PT0152	1	5	1	1	0	0	0	0	0	0	1	1	1	1	1	0	1	0	1	0	0	1	1	0	WHITE
PT0153	1	5	1	0	0	0	0	0	0	0	1	1	1	1	0	0	1	0	0	0	1	1	0	1	BLACK OR AFRICAN AMERICAN
PT0154	1	5	1	1	0	0	0	0	0	1	0	1	1	1	0	0	1	0	1	0	0	1	1	1	WHITE
PT0155	1	5	1	0	1	1	1	0	0	1	1	1	0	0	0	0	1	0	0	1	1	1	1	1	BLACK OR AFRICAN AMERICAN
PT0156	1	5	1	0	0	0	0	0	0	0	0	1	0	0	0	0	1	0	0	0	1	1	0	0	WHITE
PT0157	1	5	1	0	1	1	1	0	0	0	1	1	1	0	0	0	1	0	0	1	1	1	1	0	WHITE
PT0158	1	5	1	0	0	0	0	0	0	0	0	1	1	1	0	1	1	0	0	0	1	1	0	0	WHITE
PT0159	1	5	1	0	0	0	0	0	0	1	1	1	1	0	0	0	1	0	0	0	1	1	0	0	WHITE
PT0160	1	5	1	0	1	1	0	0	0	0	1	0	0	1	0	0	1	0	0	1	0	1	0	0	WHITE
PT0161	1	5	1	0	0	0	0	0	0	1	1	1	1	0	0	0	1	0	0	0	1	1	0	0	BLACK OR AFRICAN AMERICAN
PT0162	1	5	1	0	1	1	0	0	0	0	0	1	1	1	0	0	1	0	0	1	1	1	0	0	WHITE
PT0163	1	5	1	0	1	1	1	0	0	0	1	1	1	1	0	0	1	0	0	1	1	1	1	0	WHITE
PT0164	1	5	1	0	0	0	0	0	0	0	0	1	1	1	0	0	1	0	0	0	1	1	0	1	BLACK OR AFRICAN AMERICAN
PT0165	1	5	1	0	1	1	0	0	0	0	1	1	1	1	0	0	1	0	0	1	1	1	0	0	WHITE
PT0166	1	5	1	0	0	0	0	0	0	1	1	1	1	1	0	0	1	0	0	0	1	1	0	1
PT0167	1	5	1	0	0	1	0	0	0	1	0	1	1	1	0	0	1	0	0	1	1	1	0	1	NATIVE HAWAIIAN OR OTHER PACIFIC ISLANDER
PT0168	1	5	1	0	0	0	0	0	0	1	0	1	1	1	0	0	1	0	0	0	1	1	0	0	BLACK OR AFRICAN AMERICAN
PT0169	1	5	1	0	0	0	0	0	0	1	0	1	0	0	0	0	1	0	0	0	1	1	0	1	BLACK OR AFRICAN AMERICAN
PT0171	1	5	1	0	0	0	0	0	0	0	1	1	1	0	0	0	1	0	0	0	1	1	0	1	BLACK OR AFRICAN AMERICAN
PT0172	1	5	1	0	0	0	0	0	0	0	1	1	1	0	0	0	1	0	0	0	1	1	0	0	WHITE
PT0176	1	5	1	0	1	1	0	0	0	0	0	1	1	1	0	0	1	0	0	1	1	1	0	0	WHITE
PT0178	1	5	1	0	0	1	0	0	0	0	0	1	1	1	1	0	1	0	0	1	1	1	0	0	WHITE
PT0180	1	5	1	0	0	0	0	0	0	0	1	1	1	0	0	0	1	0	0	0	1	1	0	0	BLACK OR AFRICAN AMERICAN
PT0181	1	5	1	0	0	0	0	0	0	0	0	1	1	0	0	0	1	0	0	0	1	1	0	0	BLACK OR AFRICAN AMERICAN
PT0182	1	5	1	0	0	0	0	0	0	1	1	1	1	1	1	0	1	0	0	0	1	1	0	0	BLACK OR AFRICAN AMERICAN
PT0185	1	5	1	1	0	0	0	0	0	1	0	1	1	0	0	0	1	0	1	0	0	1	1	1	WHITE
PT0187	1	5	1	0	0	1	0	0	0	0	0	1	1	1	0	0	1	0	0	1	1	1	0	1	BLACK OR AFRICAN AMERICAN
PT0190	1	5	1	0	0	0	0	0	0	1	1	1	1	1	0	0	1	0	0	0	1	1	0	0	WHITE
PT0193	1	5	1	0	0	0	0	0	0	0	1	1	1	1	0	0	1	0	0	0	1	1	0	0	WHITE
PT0194	1	5	1	0	0	1	0	0	0	0	1	0	0	0	0	0	1	0	0	1	0	1	0	0	BLACK OR AFRICAN AMERICAN
PT0195	1	5	1	0	1	1	0	0	0	0	0	1	1	1	0	0	1	0	0	1	1	1	0	0	BLACK OR AFRICAN AMERICAN
PT0196	1	5	1	0	1	0	0	0	0	1	0	1	1	1	0	0	1	0	0	1	1	1	0	0	BLACK OR AFRICAN AMERICAN
PT0198	1	5	1	0	0	0	0	0	0	0	1	1	1	0	0	0	1	0	0	0	1	1	0	0	WHITE
PT0204	1	5	1	0	1	0	0	0	0	0	1	1	1	1	0	0	1	0	0	1	1	1	0	0	WHITE
PT0205	1	5	1	0	0	0	0	0	0	0	0	1	1	1	0	0	1	0	0	0	1	1	0	0	WHITE
PT0210	1	5	1	0	0	0	0	0	0	0	1	1	1	0	0	0	1	0	0	0	1	1	0	0	WHITE
PT0211	1	5	1	0	0	0	0	0	0	1	0	1	1	0	0	0	1	0	0	0	1	1	0	0	WHITE
PT0212	1	5	1	0	0	0	0	0	0	0	1	1	1	1	0	0	1	0	0	0	1	1	0	1	WHITE
PT0214	1	5	1	0	0	0	0	0	0	1	1	1	1	1	0	0	1	0	0	0	1	1	0	0	BLACK OR AFRICAN AMERICAN
PT0215	1	5	1	0	1	1	1	0	0	1	1	1	1	1	0	0	1	0	0	1	1	1	1	1	WHITE
PT0221	1	5	1	0	0	0	0	0	0	1	1	1	1	1	0	1	1	0	0	0	1	1	0	0	BLACK OR AFRICAN AMERICAN
PT0222	1	5	1	0	0	0	0	0	0	1	1	1	1	1	0	0	1	0	0	0	1	1	0	1	BLACK OR AFRICAN AMERICAN
PT0223	1	5	1	0	0	0	0	0	0	1	0	1	0	0	0	0	1	0	0	0	1	1	0	1	WHITE
PT0225	1	5	1	0	0	0	0	0	0	1	1	1	1	0	0	0	1	0	0	0	1	1	0	0	WHITE
PT0226	1	5	1	0	0	0	0	0	0	1	0	1	1	1	1	0	1	0	0	0	1	1	0	1	WHITE
PT0227	1	5	1	0	0	0	0	0	0	0	0	1	0	0	1	0	1	0	0	0	1	1	0	0	WHITE
PT0228	1	5	1	0	0	0	0	0	0	0	1	1	1	0	0	0	1	0	0	0	1	1	0	0	WHITE
PT0230	1	5	1	0	0	0	0	0	0	1	0	1	1	1	0	0	1	0	0	0	1	1	0	1	BLACK OR AFRICAN AMERICAN
PT0231	1	5	1	0	1	1	0	0	0	0	1	1	1	1	0	0	1	0	0	1	1	1	0	0	BLACK OR AFRICAN AMERICAN
PT0232	1	5	1	0	0	1	1	0	0	1	1	0	0	0	0	0	1	0	0	1	0	1	0	0	BLACK OR AFRICAN AMERICAN
PT0233	1	5	1	0	0	0	0	0	0	0	0	1	1	1	0	0	1	0	0	0	1	1	0	0	BLACK OR AFRICAN AMERICAN
PT0234	1	5	1	0	1	1	0	0	0	1	1	1	1	1	1	0	1	0	0	1	1	1	0	0	WHITE
PT0236	1	5	1	0	0	1	0	0	0	1	0	1	1	0	0	0	1	0	0	1	1	1	0	0	BLACK OR AFRICAN AMERICAN
PT0237	1	5	1	0	0	0	0	0	0	1	1	1	1	1	0	0	1	0	0	0	1	1	0	1	BLACK OR AFRICAN AMERICAN
PT0238	1	5	1	0	1	1	0	0	0	0	0	1	1	1	0	0	1	0	0	1	1	1	0	1	BLACK OR AFRICAN AMERICAN
PT0239	1	5	1	1	0	0	0	0	0	1	0	1	0	0	0	0	1	0	1	0	0	1	1	0	WHITE
PT0240	1	5	1	0	0	1	0	0	0	1	1	1	1	1	0	0	1	0	0	1	1	1	0	0	WHITE
PT0241	1	5	1	0	0	0	0	0	0	1	0	1	1	1	0	0	1	0	0	0	1	1	0	0	BLACK OR AFRICAN AMERICAN
PT0242	1	5	1	0	0	0	0	0	0	0	1	1	1	1	0	0	1	0	0	0	1	1	0	0	BLACK OR AFRICAN AMERICAN
PT0243	1	5	1	0	0	0	0	0	0	0	0	1	1	1	0	0	1	0	0	0	1	1	0	0	WHITE
PT0246	1	5	1	0	0	0	0	0	0	1	0	1	0	0	1	0	1	0	0	0	1	1	0	0	WHITE
PT0253	1	5	1	0	0	0	0	0	0	0	0	1	1	1	0	0	1	0	0	0	1	1	0	0	WHITE
PT0254	1	5	1	0	0	1	0	0	0	1	1	1	1	1	0	0	1	0	0	1	1	1	0	0	WHITE
PT0255	1	5	1	0	0	0	0	0	0	1	1	1	1	1	0	0	1	0	0	0	1	1	0	1	BLACK OR AFRICAN AMERICAN
PT0256	1	5	1	1	0	0	0	0	0	0	1	1	1	1	1	0	1	0	1	0	0	1	1	1	WHITE
PT0258	1	5	1	0	1	0	0	0	0	0	1	1	1	1	0	0	1	0	0	1	1	1	0	0	WHITE
PT0260	1	5	1	0	0	1	1	1	1	1	1	0	0	0	0	0	1	0	0	1	0	1	0	0	WHITE
PT0261	1	5	1	0	0	1	1	1	0	0	0	1	0	0	0	0	1	0	0	1	1	1	0	1	WHITE
PT0262	1	5	1	0	1	0	0	0	0	1	1	1	1	1	0	0	1	0	0	1	1	1	0	0	BLACK OR AFRICAN AMERICAN
PT0264	1	5	1	0	0	0	0	0	0	0	1	1	1	0	0	0	1	0	0	0	1	1	0	0	BLACK OR AFRICAN AMERICAN
PT0265	1	5	1	0	1	1	0	0	0	1	1	0	0	0	0	0	1	0	0	1	0	1	0	1	BLACK OR AFRICAN AMERICAN
PT0267	1	5	1	0	0	1	1	1	0	1	1	0	0	0	0	0	1	0	0	1	0	1	0	0	BLACK OR AFRICAN AMERICAN
PT0270	1	5	1	0	0	0	0	0	0	1	0	1	1	1	1	0	1	0	0	0	1	1	0	1	WHITE
PT0271	1	5	1	0	1	1	1	0	0	0	1	1	1	1	0	0	1	0	0	1	1	1	1	0	BLACK OR AFRICAN AMERICAN
PT0273	1	5	1	0	0	0	0	0	0	0	0	1	1	0	0	0	1	0	0	0	1	1	0	1
PT0274	1	5	1	0	1	0	0	0	0	1	0	1	1	1	0	1	1	0	0	1	1	1	0	1	BLACK OR AFRICAN AMERICAN
PT0280	1	5	1	0	0	0	0	0	0	1	0	1	1	1	0	0	1	0	0	0	1	1	0	0	DECLINED TO ANSWER
PT0281	1	5	1	0	1	0	0	0	0	1	0	1	1	1	0	0	1	0	0	1	1	1	0	1	BLACK OR AFRICAN AMERICAN
PT0282	1	5	1	0	0	0	0	0	0	0	1	1	1	1	0	0	1	0	0	0	1	1	0	0	WHITE
PT0283	1	5	1	0	0	0	0	0	0	0	1	1	1	1	1	0	1	0	0	0	1	1	0	0	WHITE
PT0284	1	5	1	0	1	1	0	0	0	0	1	1	1	1	0	0	1	0	0	1	1	1	0	0	WHITE
PT0285	1	5	1	0	0	0	0	0	0	0	0	1	1	1	0	0	1	0	0	0	1	1	0	0	WHITE
PT0287	1	5	1	0	0	0	0	0	0	1	1	1	1	1	0	0	1	0	0	0	1	1	0	0	BLACK OR AFRICAN AMERICAN
PT0292	1	5	1	0	0	0	0	0	0	1	0	1	1	1	0	0	1	0	0	0	1	1	0	0	BLACK OR AFRICAN AMERICAN
PT0293	1	5	1	0	0	0	0	0	0	0	1	1	0	0	0	0	1	0	0	0	1	1	0	0	BLACK OR AFRICAN AMERICAN
PT0296	1	5	1	0	0	0	0	0	0	0	1	1	1	1	1	1	1	0	0	0	1	1	0	0	WHITE
PT0298	1	5	1	0	1	1	1	0	0	1	0	1	1	1	0	0	1	0	0	1	1	1	1	1	BLACK OR AFRICAN AMERICAN
PT0299	1	5	1	0	1	1	0	0	0	1	1	1	1	1	0	0	1	0	0	1	1	1	0	0	WHITE
PT0300	1	5	1	0	1	1	0	0	0	0	0	1	1	1	0	0	1	0	0	1	1	1	0	0	WHITE
PT0302	1	5	1	0	0	0	0	0	0	1	1	1	1	1	1	1	1	0	0	0	1	1	0	0	BLACK OR AFRICAN AMERICAN
PT0303	1	5	1	0	0	0	0	0	0	0	1	1	1	1	0	0	1	0	0	0	1	1	0	0	BLACK OR AFRICAN AMERICAN
PT0305	1	5	1	0	0	0	0	0	0	1	1	1	1	1	0	0	1	0	0	0	1	1	0	0	WHITE
PT0308	1	5	1	1	0	0	0	0	0	1	0	1	1	1	0	1	1	0	1	0	0	1	1	1	BLACK OR AFRICAN AMERICAN
PT0309	1	5	1	0	0	0	0	0	0	0	1	1	1	1	0	0	1	0	0	0	1	1	0	0	BLACK OR AFRICAN AMERICAN
PT0310	1	5	1	0	0	1	1	1	1	1	0	1	0	0	1	0	1	0	0	1	1	1	0	1	WHITE
PT0311	1	5	1	0	0	0	0	0	0	1	1	1	1	1	0	0	1	0	0	0	1	1	0	1	BLACK OR AFRICAN AMERICAN
PT0312	1	5	1	0	1	1	1	0	0	0	1	0	0	0	0	0	1	0	0	1	0	1	1	0	BLACK OR AFRICAN AMERICAN
PT0313	1	5	1	0	0	0	0	0	0	0	1	1	0	1	0	0	1	0	0	0	1	1	0	0	WHITE
PT0314	1	5	1	0	1	0	1	0	0	0	1	1	0	0	0	0	1	0	0	1	1	1	0	0	WHITE
PT0315	1	5	1	0	0	0	0	0	0	0	1	1	1	1	0	0	1	0	0	0	1	1	0	0	WHITE
PT0316	1	5	1	0	0	0	0	0	0	0	1	1	1	0	0	0	1	0	0	0	1	1	0	0	DECLINED TO ANSWER
PT0317	1	5	1	0	1	0	0	0	0	0	0	1	1	0	0	0	1	0	0	1	1	1	0	0
PT0318	1	5	1	0	1	0	1	0	0	1	0	1	0	0	0	0	1	0	0	1	1	1	0	1	BLACK OR AFRICAN AMERICAN
PT0319	1	5	1	0	0	0	0	0	0	1	0	1	0	0	0	0	1	0	0	0	1	1	0	1	BLACK OR AFRICAN AMERICAN
PT0320	1	5	1	0	1	1	1	0	0	0	0	1	1	1	0	0	1	0	0	1	1	1	1	0	BLACK OR AFRICAN AMERICAN
PT0321	1	5	1	0	0	0	0	0	0	1	0	1	1	1	0	0	1	0	0	0	1	1	0	0	WHITE
PT0322	1	5	1	0	0	0	0	0	0	1	0	1	1	1	0	0	1	0	0	0	1	1	0	1	BLACK OR AFRICAN AMERICAN
PT0324	1	5	1	0	1	0	1	0	0	0	1	0	0	0	0	0	1	0	0	1	0	1	0	0
PT0325	1	5	1	0	0	0	0	0	0	1	0	1	1	1	0	0	1	0	0	0	1	1	0	0	WHITE
PT0327	1	5	1	0	1	1	1	0	0	0	1	1	1	1	0	0	1	0	0	1	1	1	1	1	WHITE
PT0328	1	5	1	0	1	1	1	0	0	0	1	1	1	0	1	0	1	0	0	1	1	1	1	0	WHITE
PT0329	1	5	1	0	0	0	0	0	0	0	1	1	1	1	0	0	1	0	0	0	1	1	0	0	BLACK OR AFRICAN AMERICAN
PT0330	1	5	1	0	1	1	1	0	0	1	1	1	1	1	0	0	1	0	0	1	1	1	1	0	WHITE
PT0333	1	5	1	0	0	1	0	0	0	1	1	1	1	1	0	0	1	0	0	1	1	1	0	0	BLACK OR AFRICAN AMERICAN
PT0334	1	5	1	1	0	0	0	0	0	1	0	1	1	1	1	0	1	0	1	0	0	1	1	0
PT0335	1	5	1	0	1	1	0	0	0	0	0	0	0	0	0	0	1	0	0	1	0	1	0	0	WHITE
PT0336	1	5	1	0	0	1	1	0	0	0	0	1	0	0	0	0	1	0	0	1	1	1	0	1	WHITE
PT0337	1	5	1	1	0	0	0	0	0	1	1	1	1	1	1	0	1	0	1	0	0	1	1	0	WHITE
PT0338	1	5	1	0	0	1	0	0	0	1	1	1	1	1	0	0	1	0	0	1	1	1	0	0	WHITE
PT0339	1	5	1	0	0	0	0	0	0	0	1	1	1	1	0	0	1	0	0	0	1	1	0	1	WHITE
PT0340	1	5	1	0	0	0	0	0	0	1	0	1	1	1	0	0	1	0	0	0	1	1	0	1	BLACK OR AFRICAN AMERICAN
PT0341	1	5	1	0	0	0	0	0	0	1	0	1	0	0	0	0	1	0	0	0	1	1	0	1	BLACK OR AFRICAN AMERICAN
PT0342	1	5	1	0	0	0	0	0	0	1	0	1	1	1	0	0	1	0	0	0	1	1	0	0	WHITE
PT0343	1	5	1	0	0	1	0	0	0	1	0	1	1	1	0	0	1	0	0	1	1	1	0	0	WHITE
PT0344	1	5	1	0	0	0	0	0	0	0	1	1	0	0	0	0	1	0	0	0	1	1	0	0
PT0345	1	5	1	0	1	1	0	0	0	1	1	1	1	1	1	1	1	0	0	1	1	1	0	0	BLACK OR AFRICAN AMERICAN
PT0346	1	5	1	0	0	0	0	0	0	1	0	1	1	1	0	0	1	0	0	0	1	1	0	1	BLACK OR AFRICAN AMERICAN
PT0347	1	5	1	0	0	0	0	0	0	0	0	1	1	1	0	0	1	0	0	0	1	1	0	0	BLACK OR AFRICAN AMERICAN
PT0347	2	5	1	0	1	1	1	0	0	0	1	1	1	1	0	0	1	0	0	1	1	1	1	0	WHITE
PT0348	1	5	1	0	0	0	0	0	0	0	1	1	1	1	0	0	1	0	0	0	1	1	0	1	BLACK OR AFRICAN AMERICAN
PT0351	1	5	1	0	1	0	1	0	0	0	1	1	0	0	0	0	1	0	0	1	1	1	0	1	BLACK OR AFRICAN AMERICAN
PT0352	1	5	1	0	0	0	0	0	0	0	1	1	1	1	0	1	1	0	0	0	1	1	0	0	WHITE
PT0353	1	5	1	0	1	1	1	0	0	0	0	0	0	0	0	0	1	0	0	1	0	1	1	1	BLACK OR AFRICAN AMERICAN
PT0357	1	5	1	0	0	1	0	0	0	1	1	0	0	0	0	0	1	0	0	1	0	1	0	0	BLACK OR AFRICAN AMERICAN
PT0360	1	5	1	0	1	0	0	0	0	0	0	1	1	0	0	0	1	0	0	1	1	1	0	0	BLACK OR AFRICAN AMERICAN
PT0361	1	5	1	1	0	1	0	0	0	1	0	1	0	0	0	0	1	0	1	1	0	1	1	0	BLACK OR AFRICAN AMERICAN
PT0363	1	5	1	0	0	1	0	0	0	1	1	1	1	0	0	0	1	0	0	1	1	1	0	1	WHITE
PT0365	1	5	1	0	0	1	1	0	0	0	0	1	1	1	0	0	1	0	0	1	1	1	0	0	WHITE
PT0366	1	5	1	0	0	0	0	0	0	0	1	1	1	1	0	0	1	0	0	0	1	1	0	1	WHITE
PT0520	1	5	1	0	1	1	0	1	0	0	0	1	1	0	1	0	1	0	0	1	1	1	1	0	WHITE
PT0521	1	5	1	0	1	0	0	0	0	0	1	1	0	1	1	1	1	0	0	1	1	1	0	0	BLACK OR AFRICAN AMERICAN
PT0522	1	5	1	0	1	1	0	0	0	0	0	0	0	0	0	0	1	0	0	1	0	1	0	1	WHITE
PT0523	1	5	1	0	1	0	0	0	0	0	1	1	1	0	0	0	1	0	0	1	1	1	0	0	BLACK OR AFRICAN AMERICAN
PT0524	1	5	1	0	0	0	0	0	0	1	0	1	0	0	0	0	1	0	0	0	1	1	0	1
PT0525	1	5	1	0	0	0	0	0	0	0	1	1	1	1	0	1	1	0	0	0	1	1	0	0
PT0526	1	5	1	0	0	1	0	0	0	1	1	1	1	1	1	0	1	0	0	1	1	1	0	0	BLACK OR AFRICAN AMERICAN
PT0527	1	5	1	1	0	1	0	0	0	1	0	1	1	1	0	0	1	0	1	1	0	1	1	1	BLACK OR AFRICAN AMERICAN
PT0528	1	5	1	0	0	1	0	0	0	1	0	1	1	0	0	0	1	0	0	1	1	1	0	1	WHITE
PT0530	1	5	1	0	0	1	0	0	0	0	0	1	1	1	0	0	1	0	0	1	1	1	0	1	WHITE
PT0531	1	5	1	0	0	0	0	0	0	0	1	1	1	0	0	0	1	0	0	0	1	1	0	0	WHITE
PT0532	1	5	1	0	0	1	1	0	0	0	0	1	0	0	0	0	1	0	0	1	1	1	0	0	BLACK OR AFRICAN AMERICAN
PT0533	1	5	1	0	0	0	0	0	0	0	1	1	1	1	0	1	1	0	0	0	1	1	0	0	BLACK OR AFRICAN AMERICAN
PT0534	1	5	1	0	0	0	0	0	0	0	0	1	1	0	0	0	0	0	0	0	1	1	0	1	BLACK OR AFRICAN AMERICAN
PT0535	1	5	1	0	0	0	0	0	0	0	1	1	1	0	0	0	1	0	0	0	1	1	0	0	WHITE
PT0537	1	5	1	0	0	1	0	0	0	1	1	1	1	1	0	0	1	0	0	1	1	1	0	0	WHITE
PT0539	1	5	1	0	0	0	0	0	0	1	1	1	1	1	0	0	1	0	0	0	1	1	0	1	DECLINED TO ANSWER
PT0540	1	5	1	0	0	0	0	0	0	0	1	1	1	0	0	0	1	0	0	0	1	1	0	1	WHITE
PT0541	1	5	1	0	0	0	0	0	0	0	0	1	1	1	0	0	1	0	0	0	1	1	0	0	WHITE
PT0542	1	5	1	0	0	0	0	0	0	1	1	1	1	1	0	0	1	0	0	0	1	1	0	0	WHITE
PT0543	1	5	1	0	0	1	0	0	0	0	1	1	0	0	0	0	1	0	0	1	1	1	0	1	WHITE
PT0544	1	5	1	0	1	1	0	0	0	0	1	1	1	1	0	0	1	0	0	1	1	1	0	0	BLACK OR AFRICAN AMERICAN
PT0545	1	5	1	0	0	1	0	0	0	0	1	1	1	1	0	0	0	0	0	1	1	1	0	0	WHITE
PT0546	1	5	1	0	0	0	0	0	0	0	1	1	1	0	0	0	1	0	0	0	1	1	0	0	WHITE
PT0548	1	5	1	0	0	1	0	0	0	0	1	1	1	0	0	0	1	0	0	1	1	1	0	0	DECLINED TO ANSWER
PT0549	1	5	1	0	1	1	0	0	0	1	1	1	1	1	0	0	1	0	0	1	1	1	0	0	BLACK OR AFRICAN AMERICAN
PT0550	1	5	1	0	0	0	0	0	0	0	1	1	1	1	0	0	1	0	0	0	1	1	0	0	WHITE
PT0552	1	5	1	0	1	0	0	0	0	0	1	1	1	0	0	0	1	0	0	1	1	1	0	0
PT0553	1	5	1	0	0	0	0	0	0	0	1	1	1	1	0	0	1	0	0	0	1	1	0	0	WHITE
PT0554	1	5	1	0	0	0	0	0	0	1	0	1	1	1	1	0	1	0	0	0	1	1	0	1	BLACK OR AFRICAN AMERICAN
PT0555	1	5	1	0	0	0	0	0	0	1	1	1	1	1	1	0	1	0	0	0	1	1	0	0	BLACK OR AFRICAN AMERICAN
PT0556	1	5	1	0	0	0	0	0	0	0	1	1	0	0	0	0	1	0	0	0	1	1	0	0	BLACK OR AFRICAN AMERICAN
PT0557	1	5	1	1	0	0	0	0	0	1	1	1	1	1	0	0	1	0	1	0	0	1	1	1	BLACK OR AFRICAN AMERICAN
PT0559	1	5	1	0	1	0	1	0	0	0	1	1	0	0	1	0	0	0	0	1	1	1	0	1	BLACK OR AFRICAN AMERICAN
PT0561	1	5	1	0	0	1	0	0	0	0	1	1	1	0	0	0	1	0	0	1	1	1	0	0
PT0563	1	5	1	0	0	1	0	0	0	1	0	1	1	0	0	0	1	0	0	1	1	1	0	0	WHITE
PT0564	1	5	1	0	0	0	0	0	0	0	1	1	1	1	0	1	1	0	0	0	1	1	0	0	BLACK OR AFRICAN AMERICAN
PT0565	1	5	1	0	1	1	1	0	0	0	1	1	1	1	0	0	1	0	0	1	1	1	1	0	BLACK OR AFRICAN AMERICAN
PT0570	1	5	1	0	0	0	0	0	0	0	0	1	0	0	0	0	1	0	0	0	1	1	0	0	WHITE
PT0571	1	5	1	0	1	1	0	0	0	1	1	1	1	1	0	0	1	0	0	1	1	1	0	0	WHITE
PT0572	1	5	1	0	0	0	0	0	0	0	1	1	1	0	1	0	1	0	0	0	1	1	0	0	WHITE
PT0574	1	5	1	0	0	0	0	0	0	0	1	1	0	0	0	0	1	0	0	0	1	1	0	0	BLACK OR AFRICAN AMERICAN
PT0577	1	5	1	0	0	0	0	0	0	0	0	1	1	1	0	0	1	0	0	0	1	1	0	0	BLACK OR AFRICAN AMERICAN
PT0578	1	5	1	0	0	0	0	0	0	0	1	1	1	1	1	0	1	0	0	0	1	1	0	0	WHITE
PT0579	1	5	1	0	1	1	0	0	0	0	1	1	1	1	0	0	1	0	0	1	1	1	0	0	WHITE
PT0581	1	5	1	0	0	0	0	0	0	1	0	1	1	1	0	0	1	0	0	0	1	1	0	0	BLACK OR AFRICAN AMERICAN
PT0582	1	5	1	0	0	1	0	0	0	1	1	0	0	1	0	0	1	0	0	1	0	1	0	0	WHITE
PT0583	1	5	1	0	0	0	0	0	0	0	1	1	0	0	0	0	1	0	0	0	1	1	0	0	WHITE
PT0584	1	5	1	0	0	1	0	1	1	0	0	1	1	1	0	0	1	0	0	1	1	1	0	0	BLACK OR AFRICAN AMERICAN
PT0585	1	5	1	0	0	1	0	0	0	0	0	1	1	1	1	0	1	0	0	1	1	1	0	0	WHITE
PT0586	1	5	1	1	0	0	0	0	0	0	1	0	0	0	0	1	1	0	1	0	0	1	1	1	BLACK OR AFRICAN AMERICAN
PT0587	1	5	1	0	1	0	0	0	0	0	1	1	1	1	0	0	1	0	0	1	1	1	0	0	BLACK OR AFRICAN AMERICAN
PT0588	1	5	1	0	0	0	0	0	0	0	1	1	1	1	0	0	1	0	0	0	1	1	0	0	WHITE
PT0590	1	5	1	0	0	1	1	0	1	1	1	1	1	1	0	0	1	0	0	1	1	1	0	0	WHITE
PT0591	1	5	1	0	0	0	0	0	0	1	1	1	1	0	0	0	1	0	0	0	1	1	0	1	BLACK OR AFRICAN AMERICAN
PT0593	1	5	1	0	0	0	0	0	0	0	1	1	1	1	0	0	1	0	0	0	1	1	0	1	WHITE
PT0596	1	5	1	0	1	1	1	0	0	0	1	0	0	0	0	0	1	0	0	1	0	1	1	1	WHITE
PT0597	1	5	1	0	0	0	0	0	0	0	1	1	1	1	0	0	1	0	0	0	1	1	0	0	BLACK OR AFRICAN AMERICAN
PT0598	1	5	1	0	0	0	0	0	0	1	1	1	1	0	0	0	1	0	0	0	1	1	0	1	WHITE
PT0600	1	5	1	0	0	0	0	0	0	0	1	1	1	1	0	0	1	0	0	0	1	1	0	0	WHITE
PT0602	1	5	1	0	0	0	0	0	0	1	0	1	1	1	0	0	1	0	0	0	1	1	0	0	BLACK OR AFRICAN AMERICAN
PT0604	1	5	1	0	0	0	0	0	0	1	1	1	1	0	0	0	1	0	0	0	1	1	0	0	WHITE
PT0605	1	5	1	0	0	0	0	0	0	0	0	1	1	1	0	0	1	0	0	0	1	1	0	0	WHITE
PT0606	1	5	1	0	0	0	0	0	0	1	1	1	1	1	0	1	1	0	0	0	1	1	0	0	BLACK OR AFRICAN AMERICAN
PT0609	1	5	1	0	0	0	0	0	0	0	0	1	1	1	0	0	1	0	0	0	1	1	0	0	WHITE
PT0610	1	5	1	0	0	0	0	0	0	1	1	1	1	0	0	0	1	0	0	0	1	1	0	1	WHITE
PT0613	1	5	1	0	0	0	0	0	0	0	1	1	1	0	0	0	0	0	0	0	1	1	0	1
PT0614	1	5	1	0	1	1	0	0	0	0	1	1	1	1	0	0	1	0	0	1	1	1	0	0	BLACK OR AFRICAN AMERICAN
PT0615	1	5	1	0	0	0	0	0	0	0	0	1	1	0	0	0	1	0	0	0	1	1	0	0	BLACK OR AFRICAN AMERICAN
PT0616	1	5	1	0	0	0	0	0	0	0	1	1	1	1	0	1	1	0	0	0	1	1	0	0	WHITE
PT0618	1	5	1	0	1	1	0	0	0	1	0	1	1	1	0	0	1	0	0	1	1	1	0	1	BLACK OR AFRICAN AMERICAN
PT0620	1	5	1	0	0	0	0	0	0	1	0	1	1	0	0	0	1	0	0	0	1	1	0	0
PT0622	1	5	1	1	1	0	0	0	0	1	1	1	1	0	0	0	1	0	1	1	0	1	1	0	WHITE
PT0623	1	5	1	0	0	0	0	0	0	0	0	1	1	1	0	0	1	0	0	0	1	1	0	1	WHITE
PT0624	1	5	1	0	0	0	0	0	0	0	1	1	1	1	0	0	1	0	0	0	1	1	0	1	BLACK OR AFRICAN AMERICAN
PT0625	1	5	1	0	0	0	0	0	0	0	0	1	0	0	0	0	1	0	0	0	1	1	0	1	WHITE
PT0626	1	5	1	0	0	0	0	0	0	1	1	1	1	1	1	0	1	0	0	0	1	1	0	1	WHITE
PT0627	1	5	1	0	1	0	0	0	0	1	0	1	1	1	1	1	1	0	0	1	1	1	0	0	BLACK OR AFRICAN AMERICAN
PT0628	1	5	1	0	0	0	0	0	0	1	1	1	1	0	0	0	1	0	0	0	1	1	0	0	WHITE
PT0630	1	5	1	0	0	0	0	0	0	0	1	1	1	0	0	0	1	0	0	0	1	1	0	0	BLACK OR AFRICAN AMERICAN
PT0631	1	5	1	0	0	1	0	0	0	0	1	1	1	1	0	0	1	0	0	1	1	1	0	0	WHITE
PT0634	1	5	1	0	0	0	0	0	0	1	0	1	1	1	0	0	1	0	0	0	1	1	0	1	BLACK OR AFRICAN AMERICAN
PT0636	1	5	1	1	0	0	0	0	0	1	0	1	1	1	1	1	1	0	1	0	0	1	1	1	BLACK OR AFRICAN AMERICAN
PT0637	1	5	1	0	0	0	0	0	0	0	1	1	0	0	0	0	1	0	0	0	1	1	0	0	BLACK OR AFRICAN AMERICAN
PT0638	1	5	1	0	0	0	0	0	0	0	1	1	1	0	0	0	1	0	0	0	1	1	0	1	BLACK OR AFRICAN AMERICAN
PT0639	1	5	1	0	0	0	0	0	0	0	1	1	1	1	0	0	1	0	0	0	1	1	0	0
PT0640	1	5	1	0	0	0	0	0	0	0	0	1	0	0	0	0	1	0	0	0	1	1	0	0	DECLINED TO ANSWER
PT0641	1	5	1	0	0	1	0	0	0	0	1	1	1	1	0	0	1	0	0	1	1	1	0	0	BLACK OR AFRICAN AMERICAN
PT0642	1	5	1	0	1	1	0	0	0	0	1	1	1	1	0	0	1	0	0	1	1	1	0	0	ASIAN
PT0644	1	5	1	0	0	0	0	0	0	1	1	1	1	1	0	0	1	0	0	0	1	1	0	1	BLACK OR AFRICAN AMERICAN
PT0645	1	5	1	0	0	0	0	0	0	0	1	1	1	1	0	0	1	0	0	0	1	1	0	0	BLACK OR AFRICAN AMERICAN
PT0646	1	5	1	0	0	0	0	0	0	0	0	1	0	0	0	0	1	0	0	0	1	1	0	1	BLACK OR AFRICAN AMERICAN
PT0647	1	5	1	0	0	0	0	0	0	0	1	1	1	1	0	0	1	0	0	0	1	1	0	1	BLACK OR AFRICAN AMERICAN
PT0649	1	5	1	0	0	0	0	0	0	1	0	1	1	1	1	0	1	0	0	0	1	1	0	1	BLACK OR AFRICAN AMERICAN
PT0650	1	5	1	1	0	0	0	0	0	1	0	1	1	0	0	0	1	0	1	0	0	1	1	1	BLACK OR AFRICAN AMERICAN
PT0651	1	5	1	0	1	0	0	0	0	1	0	1	1	0	0	0	1	0	0	1	1	1	0	0	BLACK OR AFRICAN AMERICAN
PT0652	1	5	1	0	0	1	0	0	0	0	1	1	0	0	0	0	1	0	0	1	1	1	0	0	WHITE
PT0654	1	5	1	0	1	1	1	0	0	1	1	1	1	0	0	0	1	0	0	1	1	1	1	1	WHITE
PT0656	1	5	1	0	1	1	0	0	0	1	0	1	1	1	0	0	1	0	0	1	1	1	0	1	WHITE
PT0657	1	5	1	0	0	0	0	0	0	1	0	1	1	1	0	0	1	0	0	0	1	1	0	0	BLACK OR AFRICAN AMERICAN
PT0659	1	5	1	0	1	0	1	0	0	0	0	1	0	0	0	0	1	0	0	1	1	1	0	1	BLACK OR AFRICAN AMERICAN
PT0662	1	5	1	0	0	0	0	0	0	1	0	1	0	1	0	0	1	0	0	0	1	1	0	0	BLACK OR AFRICAN AMERICAN
PT0664	1	5	1	0	1	0	1	0	1	1	0	1	1	0	0	0	1	0	0	1	1	1	0	0	BLACK OR AFRICAN AMERICAN
PT0665	1	5	1	0	1	1	0	1	0	0	0	0	0	0	0	0	1	0	0	1	0	1	1	1	BLACK OR AFRICAN AMERICAN
PT0668	1	5	1	0	0	0	0	0	0	1	1	1	1	1	1	1	1	0	0	0	1	1	0	0	WHITE
PT0669	1	5	1	0	0	0	0	0	0	1	0	1	0	0	0	0	1	0	0	0	1	1	0	0	WHITE
PT0673	1	5	1	0	0	0	0	0	0	1	1	1	1	1	0	1	1	0	0	0	1	1	0	1	BLACK OR AFRICAN AMERICAN
PT0674	1	5	1	0	0	0	0	0	0	0	1	1	1	1	0	0	1	0	0	0	1	1	0	0	WHITE
PT0675	1	5	1	0	0	0	0	0	0	0	0	1	0	0	0	0	1	0	0	0	1	1	0	1	BLACK OR AFRICAN AMERICAN
PT0676	1	5	1	0	0	0	0	0	0	1	0	1	1	1	1	0	1	0	0	0	1	1	0	1	WHITE
PT0677	1	5	1	0	0	0	0	0	0	1	1	1	1	1	1	0	1	0	0	0	1	1	0	0	BLACK OR AFRICAN AMERICAN
PT0678	1	5	1	0	0	0	0	1	0	0	1	1	1	1	0	1	1	0	0	0	1	1	0	0	WHITE
PT0679	1	5	1	0	0	0	0	0	0	0	1	1	0	0	0	0	1	0	0	0	1	1	0	1	BLACK OR AFRICAN AMERICAN
PT0680	1	5	1	0	1	1	0	0	0	0	1	1	1	1	0	0	1	0	0	1	1	1	0	0	BLACK OR AFRICAN AMERICAN
PT0681	1	5	1	0	0	0	0	0	0	0	0	1	1	1	1	0	1	0	0	0	1	1	0	0	WHITE
PT0684	1	5	1	0	0	1	0	0	0	1	0	1	1	1	1	1	1	0	0	1	1	1	0	0	WHITE
PT0685	1	5	1	0	1	0	0	0	0	0	1	1	1	1	0	0	1	0	0	1	1	1	0	1	BLACK OR AFRICAN AMERICAN
PT0687	1	5	1	0	1	1	0	0	0	1	1	1	1	0	0	0	1	0	0	1	1	1	0	1	BLACK OR AFRICAN AMERICAN
PT0688	1	5	1	0	0	0	0	0	0	0	1	1	1	0	1	0	1	0	0	0	1	1	0	0	WHITE
PT0690	1	5	1	0	0	1	0	1	0	0	1	1	1	1	1	0	1	0	0	1	1	1	0	0	WHITE
PT0691	1	5	1	0	0	0	0	0	0	0	1	1	1	0	0	0	1	0	0	0	1	1	0	0	WHITE
PT0693	1	5	1	1	0	1	0	0	0	0	1	1	1	1	0	0	1	0	1	1	0	1	1	1	WHITE
PT0694	1	5	1	0	1	0	0	0	0	0	1	1	1	1	0	1	1	0	0	1	1	1	0	0	WHITE
PT0695	1	5	1	0	0	0	0	0	0	0	1	1	1	1	0	0	1	0	0	0	1	1	0	0	BLACK OR AFRICAN AMERICAN
PT0696	1	5	1	1	0	0	0	0	0	1	0	1	1	1	1	0	1	0	1	0	0	1	1	1	BLACK OR AFRICAN AMERICAN
PT0697	1	5	1	0	1	1	1	0	0	0	0	1	1	0	0	0	1	0	0	1	1	1	1	0	WHITE
PT0699	1	5	1	0	0	0	0	0	0	0	0	1	1	1	1	0	1	0	0	0	1	1	0	1	WHITE
PT0700	1	5	1	0	0	0	0	0	0	0	0	1	1	1	0	1	1	0	0	0	1	1	0	1	BLACK OR AFRICAN AMERICAN
PT0701	1	5	1	0	0	0	0	0	0	1	1	1	1	1	0	0	1	0	0	0	1	1	0	0	WHITE
PT0704	1	5	1	0	1	0	0	0	0	1	0	1	1	1	0	0	1	0	0	1	1	1	0	0	WHITE
PT0705	1	5	1	0	1	0	1	1	1	0	1	1	1	1	0	0	1	0	0	1	1	1	0	1	BLACK OR AFRICAN AMERICAN
PT0707	1	5	1	0	0	0	0	0	0	1	1	1	1	0	0	1	1	0	0	0	1	1	0	0	WHITE
PT0708	1	5	1	0	1	0	0	0	0	0	0	1	1	1	0	0	1	0	0	1	1	1	0	0	WHITE
PT0709	1	5	1	0	0	0	0	0	0	0	0	1	1	1	0	0	1	0	0	0	1	1	0	0	BLACK OR AFRICAN AMERICAN
PT0710	2	5	1	0	0	0	0	0	0	1	0	1	1	0	0	1	0	0	0	0	1	1	0	0	BLACK OR AFRICAN AMERICAN
PT0712	1	5	1	1	0	0	0	0	0	1	1	1	1	1	0	0	0	0	1	0	0	1	1	1
PT0713	1	5	1	0	0	0	0	0	0	1	1	1	1	1	0	0	0	0	0	0	1	1	0	1	BLACK OR AFRICAN AMERICAN
PT0714	1	5	1	0	1	1	0	0	0	0	1	1	0	0	0	0	1	0	0	1	1	1	0	0	WHITE
PT0718	1	5	1	0	1	1	0	0	0	0	0	1	1	1	0	0	1	0	0	1	1	1	0	0	WHITE
PT0719	1	5	1	0	0	0	0	0	0	0	1	1	1	0	0	0	1	0	0	0	1	1	0	0	WHITE
PT0720	1	5	1	1	0	0	0	0	0	1	0	1	1	1	0	0	1	0	1	0	0	1	1	0	BLACK OR AFRICAN AMERICAN
PT0722	1	5	1	0	1	1	1	0	0	0	1	1	0	1	0	0	1	0	0	1	1	1	1	0	WHITE
PT0723	1	5	1	0	0	1	0	0	0	1	0	1	1	1	1	0	1	0	0	1	1	1	0	0	BLACK OR AFRICAN AMERICAN
PT0725	1	5	1	0	0	0	0	0	0	1	0	1	1	1	0	0	1	0	0	0	1	1	0	1	BLACK OR AFRICAN AMERICAN
PT0727	1	5	1	0	0	0	0	0	0	0	1	1	1	1	0	0	1	0	0	0	1	1	0	1	WHITE
PT0728	1	5	1	0	0	1	1	1	0	0	0	1	0	0	0	0	1	0	0	1	1	1	0	1	WHITE
PT0729	1	5	1	0	0	1	0	0	0	1	0	1	1	1	0	0	1	0	0	1	1	1	0	0	WHITE
PT0730	1	5	1	0	0	0	0	0	0	0	1	1	1	1	0	0	1	0	0	0	1	1	0	0	BLACK OR AFRICAN AMERICAN
PT0732	1	5	1	0	0	0	0	0	0	0	0	1	0	0	0	1	1	0	0	0	1	1	0	0	WHITE
PT0733	1	5	1	0	0	0	0	0	0	0	0	1	1	0	0	0	1	0	0	0	1	1	0	0	WHITE
PT0735	1	5	1	0	0	0	0	0	0	1	0	1	1	1	0	0	1	0	0	0	1	1	0	0	WHITE
PT0737	1	5	1	0	0	0	0	0	0	1	1	1	1	1	0	1	1	0	0	0	1	1	0	0	WHITE
PT0738	1	5	1	1	1	1	0	1	0	1	0	1	1	1	1	0	1	0	1	1	0	1	1	0	WHITE
PT0745	1	5	1	0	0	0	0	0	0	0	1	1	0	0	0	0	1	0	0	0	1	1	0	0	WHITE
PT0746	1	5	1	1	1	0	0	0	0	1	0	1	1	1	0	0	1	0	1	1	0	1	1	1	WHITE
PT0747	1	5	1	0	0	0	0	0	0	1	0	1	1	1	0	0	1	0	0	0	1	1	0	0	WHITE
PT0748	1	5	1	0	0	1	0	0	0	1	1	1	1	1	0	0	1	0	0	1	1	1	0	0	WHITE
PT0751	1	5	1	0	0	0	0	0	0	0	0	1	0	0	0	0	1	0	0	0	1	1	0	1
PT0753	1	5	1	0	0	0	0	0	0	1	1	1	1	1	0	0	1	0	0	0	1	1	0	1	WHITE
PT0755	1	5	1	0	0	0	0	0	0	0	1	1	1	1	0	0	1	0	0	0	1	1	0	0	BLACK OR AFRICAN AMERICAN
PT0757	1	5	1	0	0	0	0	0	0	1	1	1	1	1	0	0	1	0	0	0	1	1	0	1	BLACK OR AFRICAN AMERICAN
PT0760	1	5	1	0	0	0	0	0	0	1	0	1	1	1	1	0	1	0	0	0	1	1	0	1	DECLINED TO ANSWER
PT0761	1	5	1	0	0	0	0	0	0	0	0	1	1	0	1	0	1	0	0	0	1	1	0	0
PT0762	1	5	1	0	1	0	0	1	0	0	1	1	1	1	0	0	1	0	0	1	1	1	0	0	BLACK OR AFRICAN AMERICAN
PT0763	1	5	1	0	0	0	0	0	0	1	1	1	1	1	0	1	1	0	0	0	1	1	0	1	BLACK OR AFRICAN AMERICAN
PT0764	1	5	1	0	1	0	0	0	0	1	0	1	1	1	0	0	1	0	0	1	1	1	0	0	BLACK OR AFRICAN AMERICAN
PT0765	1	5	1	0	0	0	0	0	0	1	0	1	1	1	1	0	1	0	0	0	1	1	0	1	WHITE
PT0767	1	5	1	0	0	0	0	0	0	0	1	1	1	1	0	0	1	0	0	0	1	1	0	1	WHITE
PT0769	1	5	1	0	0	0	0	0	0	0	1	1	0	0	0	0	1	0	0	0	1	1	0	1	BLACK OR AFRICAN AMERICAN
PT0770	1	5	1	0	1	0	0	0	0	0	1	1	1	1	0	0	1	0	0	1	1	1	0	0	BLACK OR AFRICAN AMERICAN
PT0771	1	5	1	0	0	0	0	0	0	1	0	1	1	1	0	0	1	0	0	0	1	1	0	1	BLACK OR AFRICAN AMERICAN
PT0772	1	5	1	0	0	0	0	0	0	1	0	1	0	0	0	0	1	0	0	0	1	1	0	0	WHITE
PT0773	1	5	1	1	0	0	0	0	0	1	0	1	1	1	1	1	1	0	1	0	0	1	1	1	BLACK OR AFRICAN AMERICAN
PT0775	1	5	1	0	1	1	0	0	0	1	1	1	1	1	0	0	1	0	0	1	1	1	0	0	WHITE
PT0779	1	5	1	1	0	0	0	0	0	1	1	1	1	1	0	1	1	0	1	0	0	1	1	0	WHITE
PT0780	1	5	1	1	0	0	0	0	0	1	1	1	1	1	0	0	1	0	1	0	0	1	1	0	WHITE
PT0782	1	5	1	0	0	0	0	0	0	0	0	1	1	1	1	0	1	0	0	0	1	1	0	1	WHITE
PT0783	1	5	1	0	0	0	0	0	0	0	1	1	1	0	0	0	1	0	0	0	1	1	0	0
PT0784	1	5	1	0	0	0	0	0	0	1	1	1	1	1	0	0	1	0	0	0	1	1	0	0
PT0785	1	5	1	0	0	0	0	0	0	0	1	1	1	1	0	1	1	0	0	0	1	1	0	0	WHITE
PT0786	1	5	1	0	0	0	0	0	0	0	0	1	0	0	0	0	1	0	0	0	1	1	0	1	BLACK OR AFRICAN AMERICAN
PT0787	1	5	1	0	0	0	0	0	0	0	1	1	1	1	0	0	1	0	0	0	1	1	0	0
PT0789	1	5	1	0	0	0	0	0	0	0	1	1	1	1	0	0	1	0	0	0	1	1	0	0	BLACK OR AFRICAN AMERICAN
PT0790	1	5	1	0	0	0	0	0	0	0	0	1	0	0	0	0	1	0	0	0	1	1	0	0	BLACK OR AFRICAN AMERICAN
PT0791	1	5	1	0	0	1	0	0	0	0	1	1	1	1	0	0	1	0	0	1	1	1	0	0	BLACK OR AFRICAN AMERICAN
PT0792	1	5	1	1	0	0	0	0	0	1	0	1	1	1	1	0	1	0	1	0	0	1	1	0	WHITE
PT0793	1	5	1	0	0	0	0	0	0	0	1	1	1	1	0	0	1	0	0	0	1	1	0	0	BLACK OR AFRICAN AMERICAN
PT0794	1	5	1	0	0	0	0	0	0	0	0	1	1	1	0	0	1	0	0	0	1	1	0	1	BLACK OR AFRICAN AMERICAN
PT0795	1	5	1	0	0	0	0	0	0	1	0	1	1	1	1	1	1	0	0	0	1	1	0	0	WHITE
PT0796	1	5	1	0	0	0	0	0	0	0	1	1	1	1	0	0	1	0	0	0	1	1	0	1	WHITE
PT0798	1	5	1	0	0	0	0	0	0	0	1	1	0	1	0	0	1	0	0	0	1	1	0	0	BLACK OR AFRICAN AMERICAN
PT0800	1	5	1	1	0	0	0	0	0	1	0	1	1	0	0	0	1	0	1	0	0	1	1	1	WHITE
PT0801	1	5	1	0	0	0	0	0	0	1	0	1	1	1	0	0	1	0	0	0	1	1	0	1	WHITE
PT0803	1	5	1	0	0	0	0	0	0	0	0	1	1	0	0	0	1	0	0	0	1	1	0	0	WHITE
PT0809	1	5	1	0	0	1	0	0	0	1	1	1	1	1	1	0	1	0	0	1	1	1	0	1	BLACK OR AFRICAN AMERICAN
PT0815	1	5	1	0	0	1	0	0	0	1	1	1	1	1	0	0	1	0	0	1	1	1	0	0	WHITE
PT0816	1	5	1	0	1	0	0	0	0	1	1	1	1	1	0	0	1	0	0	1	1	1	0	0	WHITE
PT0821	1	5	1	0	0	1	0	0	0	0	1	1	1	1	0	0	1	0	0	1	1	1	0	0	WHITE
PT0822	1	5	1	0	1	1	1	0	0	0	0	1	0	0	1	0	1	0	0	1	1	1	1	0	WHITE
PT0824	1	5	1	0	0	0	0	0	0	1	0	1	1	1	0	0	1	0	0	0	1	1	0	1	BLACK OR AFRICAN AMERICAN
PT0826	1	5	1	0	1	1	1	0	0	0	1	1	0	0	0	0	1	0	0	1	1	1	1	0	BLACK OR AFRICAN AMERICAN
PT0827	1	5	1	0	0	0	0	0	0	0	1	1	1	1	0	1	1	0	0	0	1	1	0	0	BLACK OR AFRICAN AMERICAN
PT0828	1	5	1	0	0	0	0	0	0	1	0	1	1	1	0	1	1	0	0	0	1	1	0	0	BLACK OR AFRICAN AMERICAN
PT0829	1	5	1	0	0	0	0	0	0	0	1	1	1	0	0	0	1	0	0	0	1	1	0	0	WHITE
PT0832	1	5	1	0	0	1	0	0	0	0	1	1	1	1	0	0	1	0	0	1	1	1	0	0	BLACK OR AFRICAN AMERICAN
PT0834	1	5	1	0	0	0	0	0	0	0	1	1	1	1	0	0	1	0	0	0	1	1	0	0
PT0836	1	5	1	0	0	1	1	0	0	0	1	1	1	0	0	0	1	0	0	1	1	1	0	0	DECLINED TO ANSWER
PT0837	1	5	1	0	0	0	0	0	0	0	1	1	0	0	0	0	1	0	0	0	1	1	0	1	WHITE
PT0840	1	5	1	0	0	0	0	0	0	1	0	1	1	1	0	0	1	0	0	0	1	1	0	1	WHITE
PT0841	1	5	1	0	1	1	1	0	1	1	1	1	1	1	1	0	1	0	0	1	1	1	1	0	BLACK OR AFRICAN AMERICAN
PT0842	1	5	1	0	0	0	0	0	0	0	1	1	1	1	0	0	1	0	0	0	1	1	0	0	WHITE
PT0843	1	5	1	0	0	0	0	0	0	0	0	1	0	0	0	0	1	0	0	0	1	1	0	0	WHITE
PT0844	1	5	1	0	0	0	0	0	0	1	1	1	1	1	0	0	1	0	0	0	1	1	0	0	WHITE
PT0845	1	5	1	0	0	0	0	0	0	0	0	1	0	0	0	0	1	0	0	0	1	1	0	1	BLACK OR AFRICAN AMERICAN
PT0848	1	5	1	1	0	0	0	0	0	1	0	1	1	1	1	0	1	0	1	0	0	1	1	0	BLACK OR AFRICAN AMERICAN
PT0849	1	5	1	0	0	0	0	0	0	0	0	1	0	0	0	0	1	0	0	0	1	1	0	1	BLACK OR AFRICAN AMERICAN
PT0851	1	5	1	0	1	0	0	0	0	0	1	1	1	1	0	0	1	0	0	1	1	1	0	0	WHITE
PT0853	1	5	1	1	0	0	0	0	0	1	0	1	1	1	0	1	1	0	1	0	0	1	1	1	BLACK OR AFRICAN AMERICAN
PT0856	1	5	1	0	0	0	0	0	0	0	1	1	1	1	0	0	1	0	0	0	1	1	0	0	BLACK OR AFRICAN AMERICAN
PT0857	1	5	1	0	0	0	0	0	0	0	0	1	1	0	0	0	1	0	0	0	1	1	0	0	WHITE
PT0859	1	5	1	0	0	0	0	0	0	0	1	1	1	1	0	0	1	0	0	0	1	1	0	0	BLACK OR AFRICAN AMERICAN
PT0860	1	5	1	0	0	1	0	0	0	1	0	1	1	1	0	0	1	0	0	1	1	1	0	1	BLACK OR AFRICAN AMERICAN
PT0861	1	5	1	0	0	0	0	0	0	1	0	1	1	0	0	0	1	0	0	0	1	1	0	0	WHITE
PT0864	1	5	1	0	0	0	0	0	0	1	0	1	1	0	1	0	1	0	0	0	1	1	0	1	WHITE
PT0866	1	5	1	0	0	0	0	0	0	1	0	1	1	1	0	0	1	0	0	0	1	1	0	1	BLACK OR AFRICAN AMERICAN
PT0867	1	5	1	0	0	0	0	0	0	1	1	1	1	1	0	0	1	0	0	0	1	1	0	0	WHITE
PT0868	1	5	1	0	0	0	0	0	0	1	0	1	1	1	0	1	1	0	0	0	1	1	0	1	BLACK OR AFRICAN AMERICAN
PT0869	1	5	1	0	0	0	0	0	0	0	0	1	1	1	0	0	1	0	0	0	1	1	0	0	BLACK OR AFRICAN AMERICAN
PT0870	1	5	1	0	0	0	0	0	0	0	1	1	1	1	0	0	1	0	0	0	1	1	0	0
PT0871	1	5	1	1	0	0	0	0	0	0	0	1	0	0	0	0	1	0	1	0	0	1	1	0	BLACK OR AFRICAN AMERICAN
PT0873	1	5	1	0	0	0	0	0	0	0	1	1	1	1	0	0	1	0	0	0	1	1	0	0
PT0874	1	5	1	0	0	1	0	0	0	1	1	1	1	0	0	0	1	0	0	1	1	1	0	1	BLACK OR AFRICAN AMERICAN
PT0877	1	5	1	0	0	1	0	0	0	0	1	1	1	1	0	0	1	0	0	1	1	1	0	1
PT0879	1	5	1	0	0	1	0	0	0	1	1	0	0	0	0	0	1	0	0	1	0	1	0	0	WHITE
PT0880	1	5	1	0	0	0	0	0	0	0	1	1	1	1	0	0	1	0	0	0	1	1	0	0	BLACK OR AFRICAN AMERICAN
PT0883	1	5	1	0	0	1	0	0	0	0	1	1	1	1	0	0	1	0	0	1	1	1	0	0	BLACK OR AFRICAN AMERICAN
PT0885	1	5	1	0	0	0	0	0	0	0	1	1	1	1	0	0	1	0	0	0	1	1	0	0	AMERICAN INDIAN OR ALASKA NATIVE
PT1038	1	5	1	0	0	1	0	0	0	1	1	1	1	1	0	0	1	0	0	1	1	1	0	0	BLACK OR AFRICAN AMERICAN
PT1040	1	5	1	1	0	0	0	0	0	0	0	1	1	1	1	0	1	0	1	0	0	1	1	1	BLACK OR AFRICAN AMERICAN
PT1043	1	5	1	0	0	0	0	0	0	1	0	1	1	1	0	1	1	0	0	0	1	1	0	1	BLACK OR AFRICAN AMERICAN
PT1044	1	5	1	0	1	1	1	0	0	0	0	1	0	0	0	0	1	0	0	1	1	1	1	1
PT1046	1	5	1	0	1	0	1	0	0	0	1	1	1	1	0	0	1	0	0	1	1	1	0	0
PT1047	1	5	1	0	0	0	0	0	0	0	1	1	1	1	0	0	1	0	0	0	1	1	0	0	BLACK OR AFRICAN AMERICAN
PT1048	1	5	1	0	0	0	0	0	0	1	1	1	1	0	0	0	1	0	0	0	1	1	0	0	WHITE
PT1050	1	5	1	0	1	1	1	0	0	0	1	1	1	1	0	0	1	0	0	1	1	1	1	0	WHITE
PT1052	1	5	1	0	1	1	0	0	0	0	1	1	1	1	0	0	1	0	0	1	1	1	0	1	BLACK OR AFRICAN AMERICAN
PT1053	1	5	1	0	0	0	0	0	0	0	1	1	1	0	0	1	1	0	0	0	1	1	0	0	WHITE
PT1054	1	5	1	0	1	0	0	0	0	0	1	1	1	1	0	0	1	0	0	1	1	1	0	0	BLACK OR AFRICAN AMERICAN
PT1055	1	5	1	0	0	0	0	0	0	1	0	1	1	0	0	0	1	0	0	0	1	1	0	0	WHITE
PT1056	1	5	1	0	0	0	0	0	0	0	1	1	1	1	0	0	1	0	0	0	1	1	0	0	BLACK OR AFRICAN AMERICAN
PT1057	1	5	1	0	1	1	1	1	0	0	0	1	1	0	0	0	1	0	0	1	1	1	1	0	WHITE
PT1059	1	5	1	0	0	0	0	0	0	0	1	1	1	0	0	0	1	0	0	0	1	1	0	0	BLACK OR AFRICAN AMERICAN
PT1060	1	5	1	0	0	1	0	0	0	0	1	1	1	1	0	0	1	0	0	1	1	1	0	0	WHITE
PT1061	1	5	1	0	1	1	1	0	0	1	0	1	0	0	0	0	1	0	0	1	1	1	1	1	BLACK OR AFRICAN AMERICAN
PT1062	1	5	1	0	1	1	1	0	0	1	0	1	1	1	0	0	1	0	0	1	1	1	1	1	WHITE
PT1064	1	5	1	0	0	1	0	0	0	1	1	1	1	1	0	0	1	0	0	1	1	1	0	0	BLACK OR AFRICAN AMERICAN
PT1065	1	5	1	0	0	0	0	0	0	0	1	1	1	1	0	0	1	0	0	0	1	1	0	0	WHITE
PT1066	1	5	1	0	1	0	0	0	0	0	1	1	1	0	0	0	1	0	0	1	1	1	0	1	BLACK OR AFRICAN AMERICAN
PT1068	1	5	1	0	0	1	0	0	0	1	0	1	1	1	0	0	1	0	0	1	1	1	0	0	BLACK OR AFRICAN AMERICAN
PT1070	1	5	1	0	0	0	0	0	0	0	1	1	1	1	0	1	1	0	0	0	1	1	0	1	BLACK OR AFRICAN AMERICAN
PT1072	1	5	1	0	0	0	0	0	0	1	0	1	1	1	0	0	1	0	0	0	1	1	0	1	AMERICAN INDIAN OR ALASKA NATIVE
PT1074	1	5	1	0	0	0	0	0	0	0	1	1	1	1	0	0	1	0	0	0	1	1	0	1	BLACK OR AFRICAN AMERICAN
PT1075	1	5	1	0	0	0	0	0	0	0	1	1	1	0	0	0	1	0	0	0	1	1	0	0	BLACK OR AFRICAN AMERICAN
PT1076	1	5	1	0	1	1	0	1	0	1	0	0	0	0	0	0	1	0	0	1	0	1	1	1	WHITE
PT1078	1	5	1	0	0	0	0	0	0	1	0	1	1	1	1	0	1	0	0	0	1	1	0	0	BLACK OR AFRICAN AMERICAN
PT1079	1	5	1	0	1	0	0	0	0	1	1	1	1	1	0	0	1	0	0	1	1	1	0	0	WHITE
PT1080	1	5	1	0	0	0	0	0	0	1	0	1	1	1	0	0	1	0	0	0	1	1	0	1	WHITE
PT1082	1	5	1	0	0	1	0	0	0	0	1	1	1	1	0	0	1	0	0	1	1	1	0	1	WHITE
PT1083	1	5	1	0	0	0	0	0	0	1	1	1	1	0	0	0	1	0	0	0	1	1	0	1	BLACK OR AFRICAN AMERICAN
PT1084	1	5	1	0	1	1	0	0	0	1	1	1	1	1	0	0	1	0	0	1	1	1	0	1	BLACK OR AFRICAN AMERICAN
PT1085	1	5	1	0	0	0	0	0	0	0	0	1	1	1	1	0	1	0	0	0	1	1	0	1	BLACK OR AFRICAN AMERICAN
PT1086	1	5	1	0	0	1	0	1	0	0	0	1	1	1	0	0	1	0	0	1	1	1	0	0	WHITE
PT1087	1	5	1	0	0	0	0	0	0	1	1	1	1	1	1	0	1	0	0	0	1	1	0	0	BLACK OR AFRICAN AMERICAN
PT1088	1	5	1	0	0	0	0	0	0	0	1	1	1	1	0	0	1	0	0	0	1	1	0	0	BLACK OR AFRICAN AMERICAN
PT1089	1	5	1	0	1	1	0	0	0	0	1	1	1	1	0	0	1	0	0	1	1	1	0	0	BLACK OR AFRICAN AMERICAN
PT1091	1	5	1	0	0	0	0	0	0	1	1	1	1	1	1	0	1	0	0	0	1	1	0	1	BLACK OR AFRICAN AMERICAN
PT1093	1	5	1	0	0	0	0	0	0	1	0	1	1	1	0	0	1	0	0	0	1	1	0	0	WHITE
PT1094	1	5	1	0	0	0	0	0	0	1	1	1	1	1	0	0	1	0	0	0	1	1	0	0	WHITE
PT1095	1	5	1	0	0	1	0	0	0	1	1	1	1	1	0	0	1	0	0	1	1	1	0	0	WHITE
PT1098	1	5	1	0	0	0	0	0	0	1	1	1	1	0	1	0	1	0	0	0	1	1	0	0	WHITE
PT1099	1	5	1	0	0	0	0	0	0	1	0	1	0	0	0	0	1	0	0	0	1	1	0	0	BLACK OR AFRICAN AMERICAN
PT1100	1	5	1	0	0	0	0	0	0	0	0	1	0	0	0	0	1	0	0	0	1	1	0	0	BLACK OR AFRICAN AMERICAN
PT1102	1	5	1	1	0	0	0	0	0	1	0	1	1	1	0	0	1	0	1	0	0	1	1	1	WHITE
PT1103	1	5	1	0	0	0	0	0	0	1	0	1	1	1	0	0	1	0	0	0	1	1	0	1	BLACK OR AFRICAN AMERICAN
PT1106	1	5	1	0	1	1	0	0	0	1	1	1	1	0	0	0	1	0	0	1	1	1	0	0	BLACK OR AFRICAN AMERICAN
PT1107	1	5	1	0	0	0	0	0	0	0	1	1	1	1	0	0	1	0	0	0	1	1	0	1	BLACK OR AFRICAN AMERICAN
PT1108	1	5	1	1	0	0	0	0	0	0	0	1	0	0	1	0	1	0	1	0	0	1	1	1	WHITE
PT1109	1	5	1	0	0	1	1	0	0	0	0	0	0	0	0	0	1	0	0	1	0	1	0	1	WHITE
PT1110	1	5	1	0	1	1	0	1	0	1	0	0	0	0	0	0	1	0	0	1	0	1	1	0	WHITE
PT1111	1	5	1	0	1	1	1	0	0	0	0	1	1	1	0	0	1	0	0	1	1	1	1	0	WHITE
PT1113	1	5	1	0	0	1	0	0	0	0	1	1	1	1	0	0	1	0	0	1	1	1	0	0	BLACK OR AFRICAN AMERICAN
PT1114	1	5	1	0	0	1	0	0	0	1	1	1	1	0	0	0	1	0	0	1	1	1	0	0	BLACK OR AFRICAN AMERICAN
PT1115	1	5	1	1	0	0	0	0	0	0	1	1	1	1	0	0	1	0	1	0	0	1	1	0	WHITE
PT1116	1	5	1	0	0	1	1	0	0	1	1	1	1	0	0	0	1	0	0	1	1	1	0	0	WHITE
PT1119	1	5	1	1	0	0	0	0	0	1	0	1	1	1	1	0	1	0	1	0	0	1	1	1	WHITE
PT1120	1	5	1	0	0	0	0	0	0	0	1	1	1	1	0	0	1	0	0	0	1	1	0	1	BLACK OR AFRICAN AMERICAN
PT1122	1	5	1	0	1	1	0	0	0	0	1	1	1	1	0	0	1	0	0	1	1	1	0	0	BLACK OR AFRICAN AMERICAN
PT1124	1	5	1	0	0	0	0	0	0	0	1	1	1	1	1	1	1	0	0	0	1	1	0	0	BLACK OR AFRICAN AMERICAN
PT1125	1	5	1	0	1	1	0	0	0	0	1	1	1	1	0	0	1	0	0	1	1	1	0	0	BLACK OR AFRICAN AMERICAN
PT1126	1	5	1	0	0	0	0	0	0	1	1	1	1	1	0	0	1	0	0	0	1	1	0	0	WHITE
PT1127	1	5	1	0	0	0	0	0	0	1	0	1	1	1	0	0	1	0	0	0	1	1	0	0	BLACK OR AFRICAN AMERICAN
PT1129	1	5	1	0	1	1	1	0	0	0	1	1	1	0	0	0	1	0	0	1	1	1	1	1	BLACK OR AFRICAN AMERICAN
PT1130	1	5	1	0	1	0	1	0	0	0	1	1	0	0	0	0	1	0	0	1	1	1	0	0	BLACK OR AFRICAN AMERICAN
PT1131	1	5	1	0	0	1	0	0	0	0	1	0	0	1	0	0	1	0	0	1	0	1	0	0
PT1134	1	5	1	0	0	1	0	0	0	1	1	0	0	1	0	0	1	0	0	1	0	1	0	0	BLACK OR AFRICAN AMERICAN
PT1136	1	5	1	0	0	0	0	0	0	1	0	1	0	0	0	0	1	0	0	0	1	1	0	1	WHITE
PT1137	1	5	1	0	0	0	0	0	0	1	1	1	1	1	0	0	1	0	0	0	1	1	0	0	BLACK OR AFRICAN AMERICAN
PT1139	1	5	1	0	0	1	1	0	0	0	0	1	0	0	0	0	1	0	0	1	1	1	0	1	WHITE
PT1141	1	5	1	0	0	1	0	0	0	0	1	1	1	1	0	0	1	0	0	1	1	1	0	0	WHITE
PT1142	1	5	1	0	0	0	0	0	0	0	0	1	1	1	0	0	1	0	0	0	1	1	0	1	BLACK OR AFRICAN AMERICAN
PT1143	1	5	1	0	1	1	1	1	0	0	1	1	0	0	0	0	1	0	0	1	1	1	1	1	BLACK OR AFRICAN AMERICAN
PT1145	1	5	1	0	1	1	1	1	0	0	0	0	0	0	0	0	1	0	0	1	0	1	1	0	WHITE
PT1146	1	5	1	0	1	1	0	1	0	1	1	1	1	1	0	0	1	0	0	1	1	1	1	0	DECLINED TO ANSWER
PT1148	1	5	1	0	1	0	0	0	0	1	1	1	1	1	0	0	1	0	0	1	1	1	0	0	WHITE
PT1149	1	5	1	0	0	0	0	0	0	0	1	1	1	0	0	0	1	0	0	0	1	1	0	1	NATIVE HAWAIIAN OR OTHER PACIFIC ISLANDER
PT1151	1	5	1	0	0	0	0	0	0	1	1	1	1	1	0	0	1	0	0	0	1	1	0	0	WHITE
PT1153	1	5	1	0	0	1	0	0	0	1	1	1	1	1	0	0	1	0	0	1	1	1	0	0	WHITE
PT1155	1	5	1	0	0	0	0	0	0	0	0	1	1	1	0	0	1	0	0	0	1	1	0	0	BLACK OR AFRICAN AMERICAN
PT1157	1	5	1	1	0	0	0	0	0	1	1	1	1	1	0	1	1	0	1	0	0	1	1	0	BLACK OR AFRICAN AMERICAN
PT1160	1	5	1	0	0	1	0	0	0	0	0	1	1	1	0	0	1	0	0	1	1	1	0	1	BLACK OR AFRICAN AMERICAN
PT1161	1	5	1	0	0	1	0	0	0	0	1	0	0	0	0	0	1	0	0	1	0	1	0	0	WHITE
PT1163	1	5	1	0	0	0	0	0	0	0	0	1	1	1	0	0	1	0	0	0	1	1	0	0	BLACK OR AFRICAN AMERICAN
PT1164	1	5	1	0	0	0	0	0	0	1	0	1	1	1	0	0	1	0	0	0	1	1	0	0	WHITE
PT1165	1	5	1	0	0	0	0	0	0	0	0	1	1	1	1	0	1	0	0	0	1	1	0	0	WHITE
PT1166	1	5	1	1	0	0	0	0	0	1	1	1	1	1	0	0	1	0	1	0	0	1	1	1	BLACK OR AFRICAN AMERICAN
PT1167	1	5	1	0	0	0	0	0	0	1	1	1	1	1	0	1	1	0	0	0	1	1	0	0	BLACK OR AFRICAN AMERICAN
PT1168	1	5	1	0	0	0	0	0	0	1	0	1	0	0	0	0	1	0	0	0	1	1	0	1	BLACK OR AFRICAN AMERICAN
PT1169	1	5	1	0	0	0	0	0	0	1	1	1	1	0	0	0	1	0	0	0	1	1	0	1	BLACK OR AFRICAN AMERICAN
PT1170	1	5	1	1	0	0	0	0	0	0	0	1	0	0	0	0	1	0	1	0	0	1	1	0	WHITE
PT1171	1	5	1	0	0	1	0	0	0	0	1	0	0	0	0	0	1	0	0	1	0	1	0	1	WHITE
PT1173	1	5	1	0	0	0	0	0	0	1	0	1	1	1	0	0	1	0	0	0	1	1	0	1
PT1174	1	5	1	0	0	0	0	0	0	1	0	1	1	0	0	0	1	0	0	0	1	1	0	0	WHITE
PT1179	1	5	1	0	0	1	0	1	0	0	1	1	1	0	0	0	1	0	0	1	1	1	0	0	BLACK OR AFRICAN AMERICAN
PT1180	1	5	1	0	1	1	0	0	0	0	1	1	1	1	1	0	1	0	0	1	1	1	0	0	WHITE
PT1181	1	5	1	0	0	1	0	0	0	1	1	1	1	1	0	0	1	0	0	1	1	1	0	1	BLACK OR AFRICAN AMERICAN
PT1182	1	5	1	0	0	0	0	0	0	0	1	1	1	1	0	0	1	0	0	0	1	1	0	0	BLACK OR AFRICAN AMERICAN
PT1184	1	5	1	0	0	0	0	0	0	0	0	1	1	1	0	0	1	0	0	0	1	1	0	1
PT1185	1	5	1	0	0	0	0	0	0	0	1	1	0	0	0	0	1	0	0	0	1	1	0	1	BLACK OR AFRICAN AMERICAN
PT1186	1	5	1	0	0	0	0	0	0	0	1	1	1	1	0	0	1	0	0	0	1	1	0	1	BLACK OR AFRICAN AMERICAN
PT1187	1	5	1	0	0	1	0	0	0	0	1	1	1	1	0	0	1	0	0	1	1	1	0	0	WHITE
PT1188	1	5	1	0	0	1	0	0	0	1	0	1	1	1	0	0	1	0	0	1	1	1	0	1	BLACK OR AFRICAN AMERICAN
PT1190	1	5	1	0	0	0	0	0	0	0	1	1	1	0	0	0	1	0	0	0	1	1	0	0	WHITE
PT1194	1	5	1	0	0	1	0	0	0	0	1	1	0	0	0	1	1	0	0	1	1	1	0	1	BLACK OR AFRICAN AMERICAN
PT1195	1	5	1	0	0	1	0	0	0	0	1	1	1	1	0	0	1	0	0	1	1	1	0	0	WHITE
PT1196	1	5	1	0	1	1	0	0	0	0	0	1	1	1	0	0	1	0	0	1	1	1	0	1	BLACK OR AFRICAN AMERICAN
PT1199	1	5	1	0	0	0	0	0	0	0	1	1	1	1	0	0	1	0	0	0	1	1	0	0	WHITE
PT1200	1	5	1	0	0	0	0	0	0	1	1	1	1	0	0	0	1	0	0	0	1	1	0	0	WHITE
PT1201	1	5	1	0	0	0	0	0	0	0	1	1	0	1	0	0	1	0	0	0	1	1	0	0	WHITE
PT1204	1	5	1	0	1	1	0	0	0	0	1	1	1	1	0	0	1	0	0	1	1	1	0	0	WHITE
PT1206	1	5	1	0	1	0	0	0	0	1	1	1	1	1	0	0	1	0	0	1	1	1	0	1	WHITE
PT1207	1	5	1	0	0	0	0	0	0	1	0	1	1	1	1	1	1	0	0	0	1	1	0	1	BLACK OR AFRICAN AMERICAN
PT1208	1	5	1	0	0	0	0	0	0	1	0	1	1	1	0	0	1	0	0	0	1	1	0	1	BLACK OR AFRICAN AMERICAN
PT1210	1	5	1	0	0	1	1	0	0	1	0	1	0	0	0	0	1	0	0	1	1	1	0	0	WHITE
PT1211	1	5	1	0	0	1	0	0	0	0	1	1	1	0	0	0	0	0	0	1	1	1	0	0	BLACK OR AFRICAN AMERICAN
PT1212	1	5	1	0	1	0	0	0	0	0	1	1	1	1	0	0	1	0	0	1	1	1	0	0	WHITE
PT1213	1	5	1	0	1	1	0	0	0	0	1	1	1	1	0	0	1	0	0	1	1	1	0	0	WHITE
PT1214	1	5	1	0	0	0	0	0	0	1	0	1	1	1	0	0	1	0	0	0	1	1	0	1	BLACK OR AFRICAN AMERICAN
PT1216	1	5	1	0	0	0	0	0	0	0	1	1	1	1	0	1	1	0	0	0	1	1	0	1	WHITE
PT1218	1	5	1	0	0	0	0	0	0	0	1	1	1	0	0	0	1	0	0	0	1	1	0	1	BLACK OR AFRICAN AMERICAN
PT1219	1	5	1	0	0	0	0	0	0	1	0	1	1	0	0	0	1	0	0	0	1	1	0	0	WHITE
PT1220	1	5	1	0	0	0	0	0	0	1	0	1	1	1	1	1	1	0	0	0	1	1	0	1	WHITE
PT1222	1	5	1	0	0	0	0	0	0	1	0	1	1	1	0	0	1	0	0	0	1	1	0	0	BLACK OR AFRICAN AMERICAN
PT1223	1	5	1	0	1	0	0	0	0	0	1	1	1	1	0	0	1	0	0	1	1	1	0	0
PT1225	1	5	1	0	1	1	1	0	0	0	1	1	0	0	0	0	1	0	0	1	1	1	1	0	WHITE
PT1226	1	5	1	0	0	1	0	0	0	0	1	1	1	1	0	0	1	0	0	1	1	1	0	0	WHITE
PT1227	1	5	1	0	0	0	0	0	0	0	0	1	0	0	0	0	1	0	0	0	1	1	0	0	BLACK OR AFRICAN AMERICAN
PT1228	1	5	1	0	0	0	0	0	0	0	0	1	1	1	0	0	1	0	0	0	1	1	0	0	WHITE
PT1229	1	5	1	0	0	1	0	0	0	0	1	1	1	1	0	0	1	0	0	1	1	1	0	0	BLACK OR AFRICAN AMERICAN
PT1230	1	5	1	0	0	0	0	0	0	0	0	1	0	1	0	0	1	0	0	0	1	1	0	1	WHITE
PT1233	1	5	1	0	0	0	0	0	0	1	0	1	1	0	1	0	1	0	0	0	1	1	0	0	WHITE
PT1234	1	5	1	0	0	1	0	0	0	1	0	1	1	1	0	1	1	0	0	1	1	1	0	0	WHITE
PT1235	1	5	1	0	0	0	0	0	0	0	0	1	1	0	0	0	1	0	0	0	1	1	0	0	WHITE
PT1236	1	5	1	0	0	0	0	0	0	1	0	1	1	0	1	0	1	0	0	0	1	1	0	1	BLACK OR AFRICAN AMERICAN
PT1237	1	5	1	0	0	0	0	0	0	0	1	1	0	0	1	0	1	0	0	0	1	1	0	0	BLACK OR AFRICAN AMERICAN
PT1238	1	5	1	0	0	0	0	0	0	1	1	1	0	1	0	1	1	0	0	0	1	1	0	0	BLACK OR AFRICAN AMERICAN
PT1239	1	5	1	0	0	0	0	0	0	0	1	1	1	1	0	0	1	0	0	0	1	1	0	0	WHITE
PT1240	1	5	1	1	0	0	0	0	0	0	0	1	1	1	1	0	1	0	1	0	0	1	1	0	BLACK OR AFRICAN AMERICAN
PT1241	1	5	1	0	0	0	0	0	0	0	1	1	1	0	0	0	1	0	0	0	1	1	0	0	WHITE
PT1242	1	5	1	0	0	1	0	0	0	1	1	1	1	1	0	1	1	0	0	1	1	1	0	1	BLACK OR AFRICAN AMERICAN
PT1243	1	5	1	1	0	0	0	0	0	1	1	1	1	1	1	1	1	0	1	0	0	1	1	0	WHITE
PT1244	1	5	1	0	0	1	0	0	0	0	1	1	1	0	0	0	1	0	0	1	1	1	0	1	BLACK OR AFRICAN AMERICAN
PT1245	1	5	1	0	0	0	0	0	0	0	1	1	1	1	0	0	1	0	0	0	1	1	0	0	WHITE
PT1246	1	5	1	0	1	0	0	0	0	0	1	1	1	1	0	0	1	0	0	1	1	1	0	0	BLACK OR AFRICAN AMERICAN
PT1248	1	5	1	1	0	0	0	0	0	0	0	1	1	1	1	0	1	0	1	0	0	1	1	0	WHITE
PT1249	1	5	1	0	0	0	0	0	0	0	1	1	1	1	0	0	1	0	0	0	1	1	0	0	WHITE
PT1250	1	5	1	0	0	1	0	0	0	0	1	1	1	1	0	0	1	0	0	1	1	1	0	0	BLACK OR AFRICAN AMERICAN
PT1251	1	5	1	0	0	0	0	0	0	1	1	1	1	1	0	0	1	0	0	0	1	1	0	1	BLACK OR AFRICAN AMERICAN
PT1252	1	5	1	0	1	0	1	0	0	0	1	1	0	0	0	0	1	0	0	1	1	1	0	0	WHITE
PT1253	1	5	1	0	0	1	0	0	0	0	0	1	1	0	0	0	1	0	0	1	1	1	0	1	BLACK OR AFRICAN AMERICAN
PT1254	1	5	1	0	0	0	0	0	0	0	0	1	1	1	0	0	1	0	0	0	1	1	0	1	WHITE
PT1255	1	5	1	0	0	1	1	0	0	0	0	1	1	0	0	0	1	0	0	1	1	1	0	1	BLACK OR AFRICAN AMERICAN
PT1256	1	5	1	0	0	0	0	0	0	0	0	1	1	0	0	0	1	0	0	0	1	1	0	0	BLACK OR AFRICAN AMERICAN
PT1260	1	5	1	0	0	0	0	0	0	0	1	1	0	0	0	0	1	0	0	0	1	1	0	1	BLACK OR AFRICAN AMERICAN
PT1261	1	5	1	0	0	0	0	0	0	1	0	1	1	1	0	0	1	0	0	0	1	1	0	1	WHITE
PT1262	1	5	1	0	0	0	0	0	0	0	0	1	0	0	0	0	1	0	0	0	1	1	0	0	BLACK OR AFRICAN AMERICAN
PT1264	1	5	1	0	0	1	0	0	0	0	1	1	1	1	0	0	1	0	0	1	1	1	0	1	BLACK OR AFRICAN AMERICAN
PT1265	1	5	1	1	0	0	0	0	0	1	0	1	1	1	0	0	1	0	1	0	0	1	1	0	BLACK OR AFRICAN AMERICAN
PT1267	1	5	1	0	0	0	0	0	0	1	1	1	1	1	1	0	1	0	0	0	1	1	0	1
PT1268	1	5	1	0	0	0	0	0	0	1	1	1	1	1	0	0	1	0	0	0	1	1	0	0	BLACK OR AFRICAN AMERICAN
PT1269	1	5	1	0	0	0	0	0	0	0	1	1	0	0	0	0	1	0	0	0	1	1	0	0
PT1270	1	5	1	0	0	1	1	0	0	0	0	1	0	0	1	0	1	0	0	1	1	1	0	1	WHITE
PT1271	1	5	1	0	1	1	1	1	0	0	0	0	0	0	0	0	1	0	0	1	0	1	1	0	BLACK OR AFRICAN AMERICAN
PT1273	1	5	1	0	0	1	0	0	0	0	1	1	1	1	1	0	1	0	0	1	1	1	0	1	BLACK OR AFRICAN AMERICAN
PT1276	1	5	1	0	0	1	0	0	0	1	0	1	1	1	0	0	1	0	0	1	1	1	0	1	BLACK OR AFRICAN AMERICAN
PT1280	1	5	1	0	0	0	0	0	0	1	1	1	1	1	0	1	1	0	0	0	1	1	0	0	BLACK OR AFRICAN AMERICAN
PT1281	1	5	1	1	0	0	0	0	0	0	0	1	1	1	0	0	1	0	1	0	0	1	1	1	WHITE
PT1282	1	5	1	0	1	1	0	0	0	0	1	1	0	0	0	0	1	0	0	1	1	1	0	0	BLACK OR AFRICAN AMERICAN
PT1283	1	5	1	0	1	1	1	0	0	0	1	1	1	1	0	0	1	0	0	1	1	1	1	0	WHITE
PT1284	1	5	1	0	0	0	0	0	0	1	1	1	1	1	0	0	1	0	0	0	1	1	0	1	BLACK OR AFRICAN AMERICAN
PT1287	1	5	1	1	0	0	0	0	0	1	1	1	1	1	0	0	1	0	1	0	0	1	1	0	WHITE
PT1288	1	5	1	0	0	0	0	0	0	0	1	1	0	0	0	0	1	0	0	0	1	1	0	0	BLACK OR AFRICAN AMERICAN
PT1289	1	5	1	0	1	0	0	0	0	1	1	1	1	1	1	0	1	0	0	1	1	1	0	0	WHITE
PT1290	1	5	1	0	1	0	0	0	0	0	1	1	1	0	0	0	1	0	0	1	1	1	0	0	BLACK OR AFRICAN AMERICAN
PT1291	1	5	1	0	0	1	0	0	0	0	1	1	1	1	0	0	1	0	0	1	1	1	0	0	BLACK OR AFRICAN AMERICAN
PT1292	1	5	1	0	1	1	0	0	0	1	1	0	0	0	0	0	1	0	0	1	0	1	0	1	WHITE
PT1293	1	5	1	0	1	0	1	0	0	0	1	1	0	0	0	0	1	0	0	1	1	1	0	0	WHITE
PT1296	1	5	1	1	1	0	0	0	0	0	1	1	1	1	1	0	1	0	1	1	0	1	1	0	BLACK OR AFRICAN AMERICAN
PT1297	1	5	1	0	1	1	1	0	0	1	1	1	1	1	0	0	1	0	0	1	1	1	1	0	WHITE
PT1298	1	5	1	0	0	0	0	0	0	0	1	1	0	0	0	0	1	0	0	0	1	1	0	1	WHITE
PT1299	1	5	1	0	0	1	1	0	0	1	1	0	0	0	0	0	1	0	0	1	0	1	0	1	BLACK OR AFRICAN AMERICAN
PT1300	1	5	1	0	0	1	0	1	0	0	0	1	1	1	0	0	1	0	0	1	1	1	0	0	WHITE
PT1301	1	5	1	0	0	0	0	0	0	1	1	1	1	1	0	0	1	0	0	0	1	1	0	1	BLACK OR AFRICAN AMERICAN
PT1306	1	5	1	0	0	0	0	0	0	0	1	1	1	1	0	0	1	0	0	0	1	1	0	1	WHITE
PT1307	1	5	1	0	0	1	1	0	0	0	1	1	0	0	0	0	1	0	0	1	1	1	0	1	WHITE
PT1308	1	5	1	0	0	1	0	0	0	1	1	1	1	1	0	1	1	0	0	1	1	1	0	0	BLACK OR AFRICAN AMERICAN
PT1309	1	5	1	1	0	0	0	0	0	1	1	1	1	1	0	0	1	0	1	0	0	1	1	1	BLACK OR AFRICAN AMERICAN
PT1311	1	5	1	0	0	0	0	0	0	0	1	1	0	0	1	0	1	0	0	0	1	1	0	0	BLACK OR AFRICAN AMERICAN
PT1312	1	5	1	0	0	0	0	0	0	1	0	1	1	1	0	0	1	0	0	0	1	1	0	1	BLACK OR AFRICAN AMERICAN
PT1313	1	5	1	0	0	1	0	0	0	1	1	1	1	1	0	0	1	0	0	1	1	1	0	0	WHITE
PT1314	1	5	1	0	0	0	0	0	0	1	1	1	1	1	0	0	1	0	0	0	1	1	0	0	WHITE
PT1315	1	5	1	0	0	1	0	0	0	1	1	0	0	0	0	0	1	0	0	1	0	1	0	1	BLACK OR AFRICAN AMERICAN
PT1317	1	5	1	0	0	0	0	0	0	0	1	1	1	1	0	0	1	0	0	0	1	1	0	0	WHITE
PT1318	1	5	1	0	0	0	0	0	0	1	1	1	1	1	0	0	1	0	0	0	1	1	0	0	WHITE
PT1319	1	5	1	0	1	0	0	0	0	1	0	1	1	1	0	0	1	0	0	1	1	1	0	0	WHITE
PT1320	1	5	1	0	0	0	0	0	0	0	0	1	1	0	0	0	1	0	0	0	1	1	0	0	WHITE
PT1321	1	5	1	0	0	0	0	0	0	0	0	1	1	1	0	0	1	0	0	0	1	1	0	1
PT1323	1	5	1	0	1	1	0	0	0	1	1	1	1	1	0	0	1	0	0	1	1	1	0	0	BLACK OR AFRICAN AMERICAN
PT1324	1	5	1	0	0	0	0	0	0	1	1	1	0	0	0	0	1	0	0	0	1	1	0	0	WHITE
PT1325	1	5	1	1	0	0	0	0	0	1	1	1	1	0	0	0	1	0	1	0	0	1	1	0	WHITE
PT1326	1	5	1	0	0	0	0	0	0	1	0	1	0	0	0	1	1	0	0	0	1	1	0	1	BLACK OR AFRICAN AMERICAN
PT1328	1	5	1	0	0	0	0	0	0	1	1	1	1	1	0	0	1	0	0	0	1	1	0	1	BLACK OR AFRICAN AMERICAN
PT1331	1	5	1	0	0	0	0	0	0	0	1	1	1	1	0	0	1	0	0	0	1	1	0	0	NATIVE HAWAIIAN OR OTHER PACIFIC ISLANDER
PT1337	1	5	1	0	0	1	1	0	0	0	0	1	0	0	0	0	1	0	0	1	1	1	0	0	WHITE
PT1339	1	5	1	0	0	1	0	0	0	0	0	1	1	1	1	0	1	0	0	1	1	1	0	0	BLACK OR AFRICAN AMERICAN
PT1340	1	5	1	0	0	0	0	0	0	0	1	1	0	0	0	0	1	0	0	0	1	1	0	0	WHITE
PT1341	1	5	1	0	1	1	0	1	0	1	1	1	1	1	0	0	1	0	0	1	1	1	1	0	WHITE
PT1342	1	5	1	0	0	0	0	0	0	0	1	1	0	0	0	0	1	0	0	0	1	1	0	1	BLACK OR AFRICAN AMERICAN
PT1343	1	5	1	0	1	1	1	0	0	1	0	1	1	1	0	0	1	0	0	1	1	1	1	1	BLACK OR AFRICAN AMERICAN
PT1345	1	5	1	1	0	0	0	0	0	1	1	1	1	0	0	1	1	0	1	0	0	1	1	0	BLACK OR AFRICAN AMERICAN
PT1346	1	5	1	0	0	1	0	0	0	1	0	1	1	1	0	0	1	0	0	1	1	1	0	1	WHITE
PT1347	1	5	1	0	1	1	0	0	0	1	1	1	1	1	1	0	1	0	0	1	1	1	0	0	WHITE
PT1349	1	5	1	0	0	0	0	0	0	1	0	1	1	1	0	0	1	0	0	0	1	1	0	1	WHITE
PT1352	1	5	1	0	0	0	0	0	0	1	0	1	1	1	1	1	1	0	0	0	1	1	0	1	BLACK OR AFRICAN AMERICAN
PT1354	1	5	1	0	0	0	0	0	0	1	0	1	1	1	1	0	1	0	0	0	1	1	0	0	BLACK OR AFRICAN AMERICAN
PT1355	1	5	1	0	0	0	0	0	0	1	0	1	1	1	1	0	1	0	0	0	1	1	0	1
PT1356	1	5	1	1	0	0	0	0	0	1	1	1	1	0	1	1	1	0	1	0	0	1	1	1	BLACK OR AFRICAN AMERICAN
PT1357	1	5	1	0	0	0	0	0	0	0	1	1	1	1	0	0	1	0	0	0	1	1	0	0	BLACK OR AFRICAN AMERICAN
PT1359	1	5	1	0	0	0	0	0	0	0	1	1	1	1	0	0	1	0	0	0	1	1	0	0	BLACK OR AFRICAN AMERICAN
PT1360	1	5	1	0	0	1	1	0	0	0	0	1	1	1	1	0	1	0	0	1	1	1	0	1	BLACK OR AFRICAN AMERICAN
PT1361	1	5	1	0	0	0	0	0	0	1	0	1	1	1	0	0	1	0	0	0	1	1	0	0	WHITE
PT1363	1	5	1	0	0	0	0	0	0	1	0	1	1	1	0	0	1	0	0	0	1	1	0	0	WHITE
PT1365	1	5	1	0	1	0	0	0	0	0	0	1	1	1	0	0	1	0	0	1	1	1	0	0	BLACK OR AFRICAN AMERICAN
PT1367	1	5	1	0	0	0	0	0	0	1	0	1	1	1	1	0	1	0	0	0	1	1	0	1	WHITE
PT1368	1	5	1	0	0	0	0	0	0	1	1	1	1	0	0	0	1	0	0	0	1	1	0	0	UNKNOWN BY PATIENT
PT1370	1	5	1	0	1	1	0	1	0	0	1	1	1	1	0	0	1	0	0	1	1	1	1	0	BLACK OR AFRICAN AMERICAN
PT1371	1	5	1	0	0	0	0	0	0	0	1	1	1	1	0	0	1	0	0	0	1	1	0	1	BLACK OR AFRICAN AMERICAN
PT1373	1	5	1	1	0	0	0	0	0	0	0	1	1	1	0	1	1	0	1	0	0	1	1	0	WHITE
PT1375	1	5	1	0	1	1	0	0	0	0	1	1	1	1	0	0	1	0	0	1	1	1	0	0	BLACK OR AFRICAN AMERICAN
PT1377	1	5	1	0	0	1	0	0	0	0	1	1	1	1	0	0	1	0	0	1	1	1	0	0	WHITE
PT1378	1	5	1	0	0	0	0	0	0	1	0	1	1	1	0	0	1	0	0	0	1	1	0	1	WHITE
PT1379	1	5	1	0	0	0	0	0	0	0	1	1	0	0	0	0	1	0	0	0	1	1	0	1
PT1381	1	5	1	0	1	0	0	0	0	0	1	1	1	1	1	0	1	0	0	1	1	1	0	1	WHITE
PT1383	1	5	1	0	0	0	0	0	0	1	1	1	0	0	0	0	1	0	0	0	1	1	0	1	WHITE
PT1384	1	5	1	0	0	1	0	0	0	1	0	1	1	0	0	0	1	0	0	1	1	1	0	0	WHITE
PT1387	1	5	1	0	0	0	0	0	0	0	1	1	0	0	0	0	1	0	0	0	1	1	0	1	WHITE
PT1389	1	5	1	0	1	0	0	0	0	0	1	1	1	0	0	0	1	0	0	1	1	1	0	0	BLACK OR AFRICAN AMERICAN
PT1390	1	5	1	1	0	0	0	0	0	1	0	0	0	0	1	0	1	0	1	0	0	1	1	1	WHITE
PT1391	1	5	1	0	1	1	1	0	0	0	1	1	0	0	0	0	1	0	0	1	1	1	1	0	WHITE
PT1392	1	5	1	1	1	0	1	0	0	1	0	1	0	1	0	0	1	0	1	1	0	1	1	1	WHITE
PT1393	1	5	1	0	0	0	0	0	0	0	1	1	1	1	0	0	1	0	0	0	1	1	0	0	WHITE
PT1394	1	5	1	0	1	0	0	0	0	0	1	1	1	0	0	0	1	0	0	1	1	1	0	0	BLACK OR AFRICAN AMERICAN
PT1396	1	5	1	0	0	1	1	1	0	1	1	1	1	1	0	1	1	0	0	1	1	1	0	0
PT1397	1	5	1	0	0	0	0	0	0	1	0	1	1	1	0	0	1	0	0	0	1	1	0	0	BLACK OR AFRICAN AMERICAN
PT1398	1	5	1	0	0	0	0	0	0	0	1	1	0	0	0	0	1	0	0	0	1	1	0	0	BLACK OR AFRICAN AMERICAN
PT1400	1	5	1	0	0	0	0	0	0	0	1	1	1	1	0	0	1	0	0	0	1	1	0	1	BLACK OR AFRICAN AMERICAN
PT1401	1	5	1	0	0	1	0	1	0	0	0	1	0	1	0	0	1	0	0	1	1	1	0	1	WHITE
PT1402	1	5	1	0	0	0	0	0	0	1	1	1	1	1	0	0	1	0	0	0	1	1	0	0	WHITE
PT1403	1	5	1	0	0	0	0	0	0	0	1	1	1	1	0	0	1	0	0	0	1	1	0	0	WHITE
PT1404	1	5	1	1	0	0	0	0	0	0	0	1	1	0	0	0	1	0	1	0	0	1	1	1	BLACK OR AFRICAN AMERICAN
PT1406	1	5	1	0	0	0	0	0	0	1	0	1	1	1	0	0	1	0	0	0	1	1	0	1	BLACK OR AFRICAN AMERICAN
PT1597	1	5	1	0	1	0	0	0	0	0	1	1	1	1	0	0	1	0	0	1	1	1	0	0	BLACK OR AFRICAN AMERICAN
PT1101	1	5	1	0	0	0	0	0	0	1	1	1	1	0	0	0	1	0	0	0	1	1	0	0	WHITE
PT0087	2	0	0	0	1	0	1	0	0	0	0	0	0	0	0	0	0	0	0	1	0	1	1	0	BLACK OR AFRICAN AMERICAN
PT0128	2	0	0	0	0	1	0	0	0	0	1	1	1	0	0	1	0	0	0	1	1	1	1	0	BLACK OR AFRICAN AMERICAN
PT0348	2	0	0	0	0	0	0	0	0	0	0	1	1	0	0	1	0	0	0	0	1	1	1	1	BLACK OR AFRICAN AMERICAN
PT0415	2	1	1	1	0	0	0	0	0	1	0	1	1	1	1	0	1	0	1	0	0	1	1	0	BLACK OR AFRICAN AMERICAN
PT0900	2	0	0	0	0	0	0	0	0	0	0	1	1	1	1	0	0	0	0	0	1	1	1	1	BLACK OR AFRICAN AMERICAN
PT1083	2	0	0	0	1	0	0	0	0	0	1	1	1	0	0	0	0	0	0	1	1	1	1	0	BLACK OR AFRICAN AMERICAN
PT1368	2	0	0	0	0	0	0	0	0	0	1	1	1	1	0	1	0	0	0	0	1	1	1	0	UNKNOWN BY PATIENT
PT1412	2	0	0	0	0	0	0	0	0	0	1	1	1	1	0	0	0	0	0	0	1	1	1	0	BLACK OR AFRICAN AMERICAN
PT1561	1	0	0	0	0	0	0	0	0	1	0	1	1	0	0	0	0	0	0	0	1	1	1	1	BLACK OR AFRICAN AMERICAN
PT1562	1	5	1	0	1	1	1	0	1	1	1	1	1	0	0	0	1	0	0	1	1	1	1	0	DECLINED TO ANSWER
PT1563	1	0	0	0	0	0	0	0	0	1	1	1	1	0	0	0	0	0	0	0	1	1	1	0	BLACK OR AFRICAN AMERICAN
PT1565	1	0	0	0	0	0	0	0	0	1	0	1	1	1	1	0	0	0	0	0	1	1	1	1	WHITE
PT1566	1	5	1	0	0	0	0	0	0	1	1	1	1	1	0	1	1	0	0	0	1	1	0	0	WHITE
PT1567	1	0	0	0	0	0	0	0	0	0	1	1	1	1	0	0	0	0	0	0	1	1	1	1	BLACK OR AFRICAN AMERICAN
PT1569	1	0	0	0	0	0	0	0	0	1	0	1	1	1	0	0	0	0	0	0	1	1	1	1	BLACK OR AFRICAN AMERICAN
PT1571	1	0	0	0	0	0	0	0	0	1	0	1	1	1	1	0	0	0	0	0	1	1	1	1	WHITE
PT1572	1	0	0	0	0	0	0	0	0	0	1	1	1	0	0	1	0	0	0	0	1	1	1	0	WHITE
PT1573	1	0	0	0	0	0	0	0	0	1	0	1	1	0	0	0	0	0	0	0	1	1	1	0	WHITE
PT1574	1	0	0	0	0	1	0	0	0	1	0	1	1	0	0	1	0	0	0	1	1	1	1	0	BLACK OR AFRICAN AMERICAN
PT1575	1	0	0	0	0	0	0	0	0	1	1	1	0	0	0	0	0	0	0	0	1	1	1	1	BLACK OR AFRICAN AMERICAN
PT1577	1	0	0	0	0	1	0	0	0	0	1	1	1	0	0	0	0	0	0	1	1	1	1	0	WHITE
PT1579	1	0	0	0	0	0	0	0	0	1	1	1	1	1	0	1	0	0	0	0	1	1	1	0	BLACK OR AFRICAN AMERICAN
PT1580	1	5	1	0	0	1	0	0	0	1	1	1	1	1	0	0	1	0	0	1	1	1	0	1	BLACK OR AFRICAN AMERICAN
PT1581	1	0	0	0	0	0	0	0	0	1	1	1	1	0	0	0	0	0	0	0	1	1	1	1	BLACK OR AFRICAN AMERICAN
PT1583	1	0	0	0	0	0	0	0	0	1	0	1	1	1	0	0	0	0	0	0	1	1	1	1	BLACK OR AFRICAN AMERICAN
PT1584	1	0	0	0	0	0	0	0	0	1	0	1	1	0	0	0	0	0	0	0	1	1	1	1	BLACK OR AFRICAN AMERICAN
PT1587	1	0	0	0	0	0	0	0	0	0	0	1	1	1	1	0	0	0	0	0	1	1	1	1	WHITE
PT1589	1	0	0	0	0	0	0	0	0	1	1	1	1	1	0	0	0	0	0	0	1	1	1	1	BLACK OR AFRICAN AMERICAN
PT1590	1	3	1	1	0	0	0	0	0	1	0	1	1	1	1	0	1	0	1	0	0	1	1	0	BLACK OR AFRICAN AMERICAN
PT1591	1	0	0	0	0	0	0	0	0	1	1	1	1	0	0	0	0	0	0	0	1	1	1	0	BLACK OR AFRICAN AMERICAN
PT1592	1	0	0	0	0	0	0	0	0	0	0	1	1	0	0	0	0	0	0	0	1	1	1	0	BLACK OR AFRICAN AMERICAN
PT1593	1	0	0	0	0	0	0	0	0	0	1	1	1	1	0	1	0	0	0	0	1	1	1	1	BLACK OR AFRICAN AMERICAN
PT1596	2	0	0	0	0	1	1	0	0	0	0	1	1	1	0	0	0	0	0	1	1	1	1	0	WHITE
PT1596	1	0	0	0	0	1	1	0	0	0	0	1	0	0	0	0	0	0	0	1	1	1	1	0	WHITE
PT1597	2	0	0	0	0	0	0	0	0	1	0	1	1	1	1	0	0	0	0	0	1	1	1	0	BLACK OR AFRICAN AMERICAN
PT1599	1	0	0	0	0	0	0	0	0	0	1	1	1	0	0	0	0	0	0	0	1	1	1	0	BLACK OR AFRICAN AMERICAN
PT1601	1	0	0	0	1	0	0	0	0	1	0	1	1	0	0	0	0	0	0	1	1	1	1	0	WHITE
PT1602	1	0	0	0	0	0	0	0	0	0	0	1	1	0	0	0	0	0	0	0	1	1	1	0	WHITE
PT1603	1	0	0	0	0	0	0	0	0	0	0	1	1	1	0	0	0	0	0	0	1	1	1	1	BLACK OR AFRICAN AMERICAN
PT1604	1	0	0	0	1	0	0	0	0	1	1	0	0	0	0	0	0	0	0	1	0	1	1	1	BLACK OR AFRICAN AMERICAN
PT1613	1	0	0	0	0	0	0	0	0	0	1	1	1	1	0	0	0	0	0	0	1	1	1	1	WHITE
PT1614	1	0	0	0	0	1	0	0	0	1	0	1	1	0	0	0	0	0	0	1	1	1	1	1	BLACK OR AFRICAN AMERICAN
PT1616	1	0	0	0	0	1	0	0	0	1	1	0	0	0	0	0	0	0	0	1	0	1	1	0	BLACK OR AFRICAN AMERICAN
PT1622	1	0	0	0	0	0	0	0	0	0	0	1	1	0	0	0	0	0	0	0	1	1	1	0	BLACK OR AFRICAN AMERICAN
PT1623	1	0	0	0	0	1	1	0	0	0	0	1	1	0	1	0	0	0	0	1	1	1	1	1	BLACK OR AFRICAN AMERICAN
PT1624	1	0	0	0	0	0	0	0	0	0	0	1	0	0	0	0	0	0	0	0	1	1	1	1	BLACK OR AFRICAN AMERICAN
PT1625	1	0	0	0	0	0	0	0	0	1	1	1	1	1	0	0	0	0	0	0	1	1	1	1	BLACK OR AFRICAN AMERICAN
PT1626	1	0	0	0	0	0	0	0	0	0	0	1	1	1	0	1	0	0	0	0	1	1	1	0	BLACK OR AFRICAN AMERICAN
PT1629	1	0	0	0	0	0	0	0	0	0	0	1	0	0	0	0	0	0	0	0	1	1	1	1	BLACK OR AFRICAN AMERICAN
PT1630	1	0	0	0	0	0	0	0	0	0	0	1	1	1	1	0	0	0	0	0	1	1	1	1	WHITE
PT1631	1	0	0	0	0	0	0	0	0	0	1	1	1	1	0	0	0	0	0	0	1	1	1	1	WHITE
PT1633	1	0	0	0	0	0	0	0	0	0	1	1	1	1	0	0	0	0	0	0	1	1	1	0	BLACK OR AFRICAN AMERICAN
PT1637	1	0	0	0	0	1	0	0	0	0	1	1	1	0	0	0	0	0	0	1	1	1	1	1	BLACK OR AFRICAN AMERICAN
PT1638	1	0	0	0	0	0	0	0	0	0	0	1	1	0	1	0	0	0	0	0	1	1	1	1	BLACK OR AFRICAN AMERICAN
PT1643	2	0	0	0	0	0	0	0	0	1	0	1	1	1	0	0	0	0	0	0	1	1	1	1	BLACK OR AFRICAN AMERICAN
PT1643	1	0	0	0	0	0	0	0	0	1	0	1	1	0	0	0	0	0	0	0	1	1	1	1	BLACK OR AFRICAN AMERICAN
PT1645	1	0	0	0	0	0	0	0	0	1	1	1	1	1	0	0	0	0	0	0	1	1	1	0	BLACK OR AFRICAN AMERICAN
PT1646	1	0	0	0	0	0	0	0	0	0	0	1	0	0	0	0	0	0	0	0	1	1	1	1	BLACK OR AFRICAN AMERICAN
PT1648	1	0	0	0	0	0	0	0	0	0	0	1	1	0	0	0	0	0	0	0	1	1	1	1	BLACK OR AFRICAN AMERICAN
PT1651	1	5	1	1	1	0	0	0	0	0	1	1	1	1	1	0	1	0	1	1	0	1	1	0
PT1654	1	0	0	0	0	0	0	0	0	0	1	1	1	1	0	0	0	0	0	0	1	1	1	0	BLACK OR AFRICAN AMERICAN
PT1656	1	0	0	0	0	0	0	0	0	1	0	1	1	0	0	0	0	0	0	0	1	1	1	1	WHITE
PT1658	1	0	0	0	0	1	0	0	0	0	1	1	1	0	0	0	0	0	0	1	1	1	1	0	UNKNOWN BY PATIENT
PT1660	1	0	0	0	0	1	0	0	0	1	1	1	1	0	0	0	0	0	0	1	1	1	1	1	BLACK OR AFRICAN AMERICAN
PT1661	1	0	0	0	0	0	0	0	0	1	0	1	1	0	0	0	0	0	0	0	1	1	1	0	BLACK OR AFRICAN AMERICAN
PT1662	1	1	1	1	0	0	0	0	0	1	0	1	1	1	1	0	1	0	1	0	0	1	1	1	WHITE
PT1663	1	0	0	0	0	0	0	0	0	1	0	1	1	1	0	1	0	0	0	0	1	1	1	0	BLACK OR AFRICAN AMERICAN
PT1664	1	0	0	0	0	0	0	0	0	1	0	1	1	1	0	0	0	0	0	0	1	1	1	1	BLACK OR AFRICAN AMERICAN
PT1666	1	0	0	0	0	0	0	0	0	0	0	1	1	1	0	0	0	0	0	0	1	1	1	1	BLACK OR AFRICAN AMERICAN
PT1667	1	0	0	0	0	0	0	0	0	1	0	1	1	0	0	0	0	0	0	0	1	1	1	1	BLACK OR AFRICAN AMERICAN
PT1668	1	5	1	1	0	0	0	0	0	1	0	1	1	1	1	0	1	0	1	0	0	1	1	1	BLACK OR AFRICAN AMERICAN
PT1669	1	0	0	0	0	0	0	0	0	0	1	1	1	1	0	0	0	0	0	0	1	1	1	0	BLACK OR AFRICAN AMERICAN
PT1670	1	0	0	0	0	0	0	0	0	1	1	1	1	1	0	0	0	0	0	0	1	1	1	1	WHITE
PT1672	1	0	0	0	1	1	1	0	0	0	1	1	1	1	0	0	0	0	0	1	1	1	0	0	BLACK OR AFRICAN AMERICAN
PT1673	1	3	1	1	0	0	0	0	0	1	0	1	1	0	1	0	1	0	1	0	0	1	1	0	UNKNOWN BY PATIENT
PT1674	1	0	0	0	0	0	0	0	0	0	1	1	1	0	0	0	0	0	0	0	1	1	1	1	BLACK OR AFRICAN AMERICAN
PT1675	1	0	0	0	0	1	0	0	0	0	1	1	1	1	0	0	0	0	0	1	1	1	1	1	BLACK OR AFRICAN AMERICAN
PT1676	1	5	1	0	0	1	0	0	0	1	1	1	1	1	0	0	1	0	0	1	1	1	0	0	WHITE
PT1679	1	0	0	0	0	0	0	0	0	0	0	1	1	1	0	0	0	0	0	0	1	1	1	0	BLACK OR AFRICAN AMERICAN
PT1680	1	0	0	0	0	0	0	0	0	0	1	1	1	1	0	0	0	0	0	0	1	1	1	1	BLACK OR AFRICAN AMERICAN
PT1681	1	0	0	0	0	1	0	0	0	0	0	1	1	1	1	0	0	0	0	1	1	1	1	1	BLACK OR AFRICAN AMERICAN
PT1682	1	0	0	0	0	1	0	0	0	0	1	1	1	0	0	0	0	0	0	1	1	1	1	0	BLACK OR AFRICAN AMERICAN
PT1685	1	0	0	0	0	1	0	0	0	0	0	1	1	1	0	0	0	0	0	1	1	1	1	0	WHITE
PT1686	1	0	0	0	0	0	0	0	0	1	0	1	1	0	0	0	0	0	0	0	1	1	1	0	BLACK OR AFRICAN AMERICAN
PT1690	1	0	0	0	0	0	0	0	0	0	1	1	1	0	0	0	0	0	0	0	1	1	1	1	WHITE
PT1692	1	0	0	0	0	0	0	0	0	0	1	1	1	0	0	0	0	0	0	0	1	1	1	0	WHITE
PT1694	1	0	0	0	1	0	0	0	0	0	1	1	1	1	0	0	0	0	0	1	1	1	1	0	WHITE
PT1695	1	0	0	0	0	0	0	0	0	0	0	1	0	0	0	0	0	0	0	0	1	1	1	0	BLACK OR AFRICAN AMERICAN
PT1700	1	0	0	0	0	0	0	0	0	0	1	1	1	0	0	0	0	0	0	0	1	1	1	1	BLACK OR AFRICAN AMERICAN
PT1701	1	0	0	0	0	1	0	0	0	1	1	1	1	1	1	0	0	0	0	1	1	1	1	1	BLACK OR AFRICAN AMERICAN
PT1705	1	0	0	0	0	0	0	0	0	1	0	1	1	0	1	0	0	0	0	0	1	1	1	0	WHITE
PT1714	1	0	0	0	0	0	0	0	0	1	1	1	1	0	0	0	0	0	0	0	1	1	1	1	BLACK OR AFRICAN AMERICAN
PT1717	1	0	0	0	0	0	0	0	0	0	1	1	0	0	0	0	0	0	0	0	1	1	1	1	BLACK OR AFRICAN AMERICAN
PT1719	1	0	0	0	0	0	0	0	0	0	1	1	1	1	0	0	0	0	0	0	1	1	1	1	BLACK OR AFRICAN AMERICAN
PT1720	1	0	0	0	0	0	0	0	0	1	1	1	1	1	0	0	0	0	0	0	1	1	1	0	WHITE
PT1723	1	0	0	0	0	0	0	0	0	0	0	1	0	0	0	0	0	0	0	0	1	1	1	0	BLACK OR AFRICAN AMERICAN
PT1728	1	0	0	0	0	0	0	0	0	1	0	1	1	1	1	0	0	0	0	0	1	1	1	1	BLACK OR AFRICAN AMERICAN
PT1733	1	0	0	0	0	0	0	0	0	1	1	1	1	0	0	0	0	0	0	0	1	1	1	1	BLACK OR AFRICAN AMERICAN
PT1735	1	0	0	0	0	0	0	0	0	0	1	1	1	1	0	0	0	0	0	0	1	1	1	1	BLACK OR AFRICAN AMERICAN
PT1736	1	0	0	0	0	0	0	0	0	0	1	1	1	1	0	0	0	0	0	0	1	1	1	0	BLACK OR AFRICAN AMERICAN
PT1737	1	0	0	0	0	0	0	0	0	1	1	1	1	1	0	0	0	0	0	0	1	1	1	0	BLACK OR AFRICAN AMERICAN
PT1739	1	0	0	0	0	0	0	0	0	0	1	1	1	0	0	1	0	0	0	0	1	1	1	0	BLACK OR AFRICAN AMERICAN
PT1746	1	0	0	0	0	0	0	0	0	1	1	1	1	1	0	0	0	0	0	0	1	1	1	1	BLACK OR AFRICAN AMERICAN
PT1753	1	0	0	0	0	0	0	0	0	0	1	1	1	0	0	0	0	0	0	0	1	1	1	0	WHITE
PT1756	1	0	0	0	0	0	0	0	0	0	0	1	1	1	1	0	0	0	0	0	1	1	1	0	WHITE
PT1759	1	0	0	0	0	0	0	0	0	1	0	1	1	0	1	0	0	0	0	0	1	1	1	0	WHITE
